# Supplementary material for: Immune-enhancing effect of Weizmannia coagulans BCG44 and its supernatant on cyclophosphamide-induced immunosuppressed mice and RAW264.7 cells via the modulation of the gut microbiota
Source: Royal Society of Chemistry journal article supplement (doi:10.1039/d4fo02452d), 2024-01-01
Supplement: d4fo02452d1.pdf [file d4fo02452d1.pdf]

## Supplementary Figure

**Supplementary Fig. S1** Basic determination of *W. coagulans* BCG44.

**Supplementary Fig. S2** Effect of *W. coagulans* BCG44 and its supernatant on the size of spleen in the CTX-induced immunosuppressed mice model.

**Supplementary Fig. S3** Effect of *W. coagulans* BCG44 and its supernatant on colon injury in the CTX-induced immunosuppressed mice.

**Supplementary Fig. S4** Effect of *W. coagulans* BCG44 and its supernatant on the gut microbiome in the CTX-induced immunosuppressed mice.

**Supplementary Fig. S5** Correlation between gut microbiota and immunity-related indicators at the Family level.

**Supplementary Fig. S6** The metabolic pathways in the gut microbiota basing the Kyoto Encyclopedia of Genes and Genomes (KEGG) database.

**Supplementary Fig. S7** The metabolites of *W. coagulans* BCG44 supernatant in superclass level under the positive and negative mode.

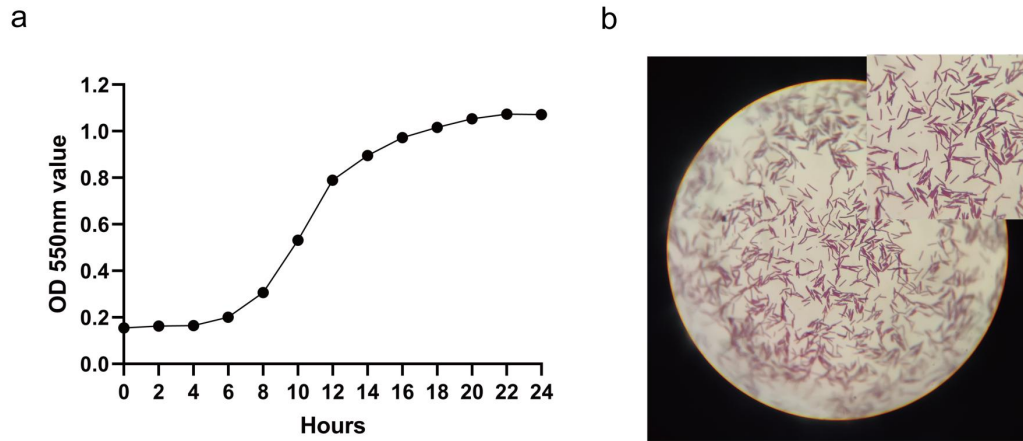

**Supplementary Fig. S1** Basic determination of *W. coagulans* BCG44 about the growth curve and microscopic morphology (a, b).

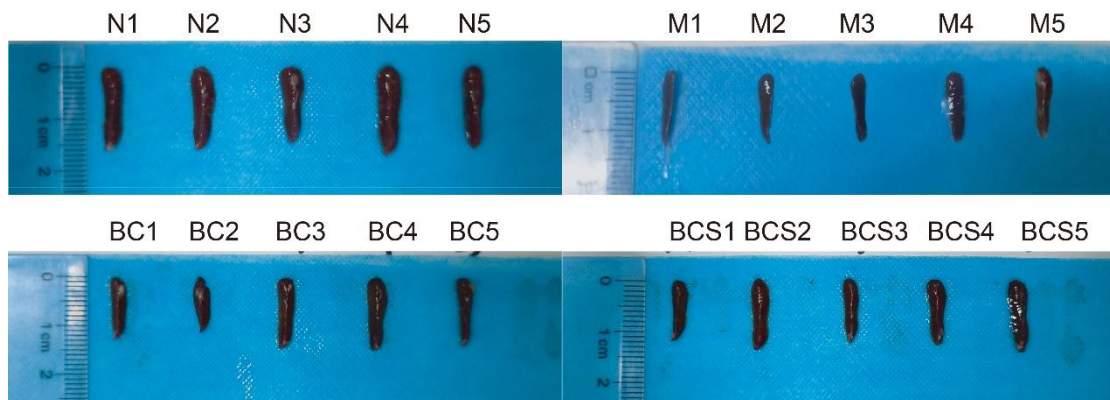

**Supplementary Fig. S2** Effect of *W. coagulans* BCG44 and its supernatant on the size of spleen in the CTX-induced immunosuppressed mice model.

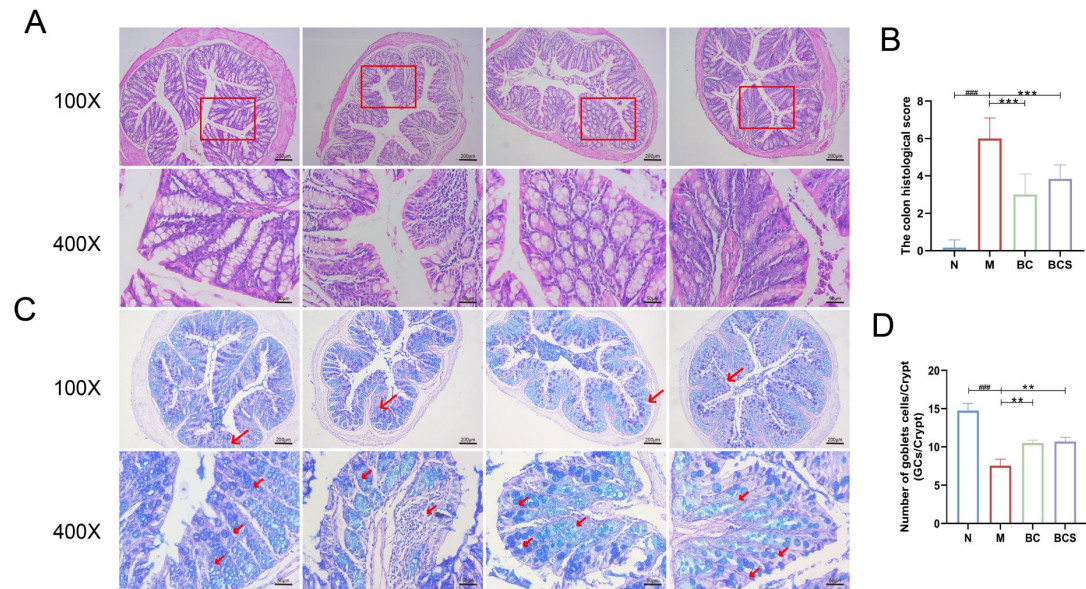

**Supplementary Fig. S3** Effect of *W. coagulans* BCG44 and its supernatant on colon injury in the CTX-induced immunosuppressed mice. (a) Morphologic analysis of the colon by H&E staining (100 × and 400 ×) (n = 5), (b) The colon histological score, (c) Morphologic analysis of the colon by AB-PAS staining (100 × and 400 ×) (n = 3), and (d) Number of goblets cells/Crypt (GCs/Crypt).

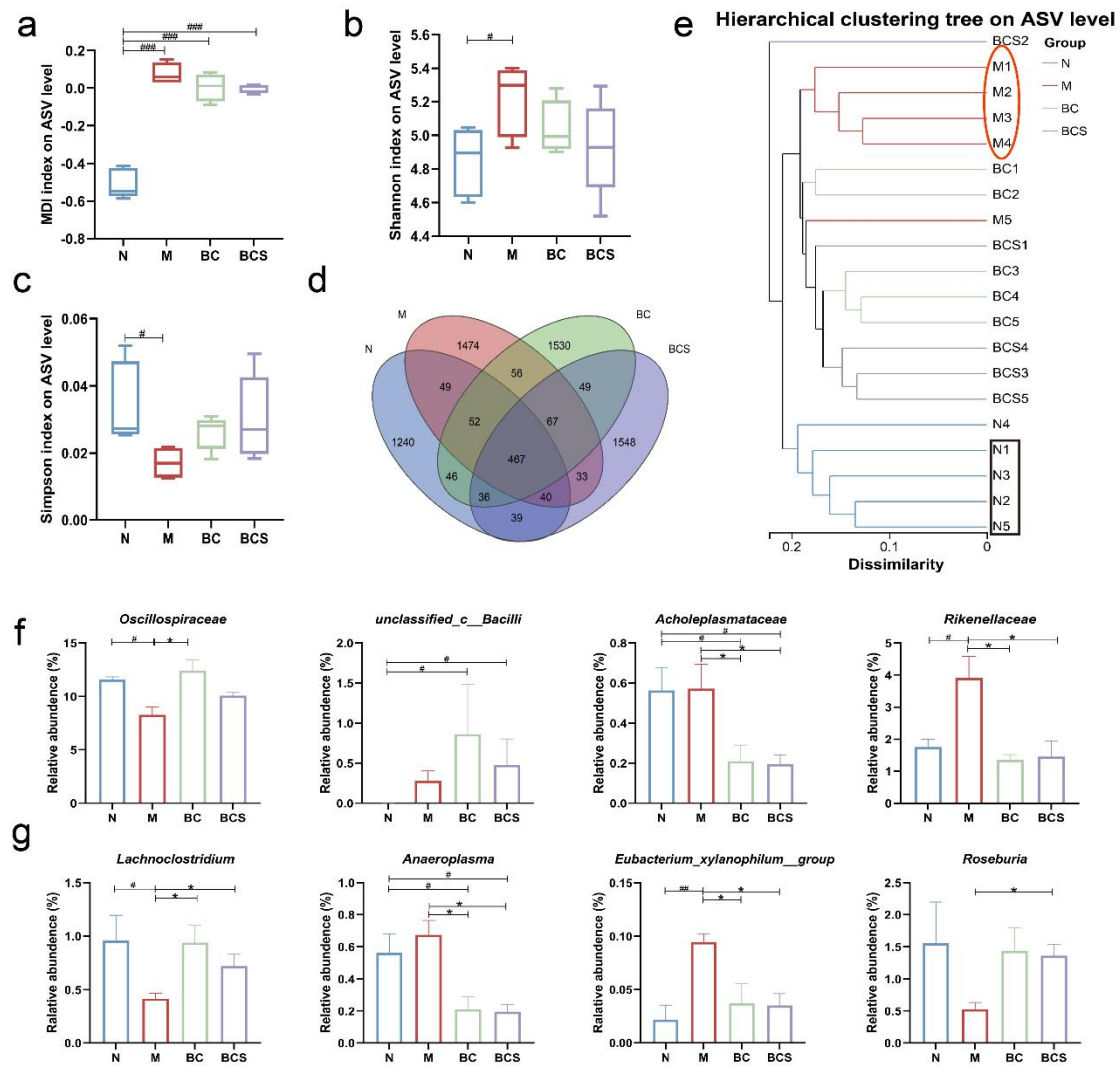

**Supplementary Fig. S4** Effect of *W. coagulans* BCG44 and its supernatant on the gut microbiome in the CTX-induced immunosuppressed mice. (a) MDI index on the ASV level, (b) Shannon index on the ASV level, (c) Simpson index on the ASV level, (d) Venn diagram. e Hierarchical clustering tree with cluster on ASV level, (f) Analyze the relative abundance of other bacteria at the family level (*Oscillospiraceae*, *unclassified\_c\_Bacilli*, *Acholeplasmataceae* and *Rikenellaceae*), and (g) Analyze the relative abundance of other bacteria at the genus level (*Lachnospirillum*, *Anaeroplasmataceae*, *Eubacterium\_xylanophilum\_group*, and *Roseburia*). (n = 5)



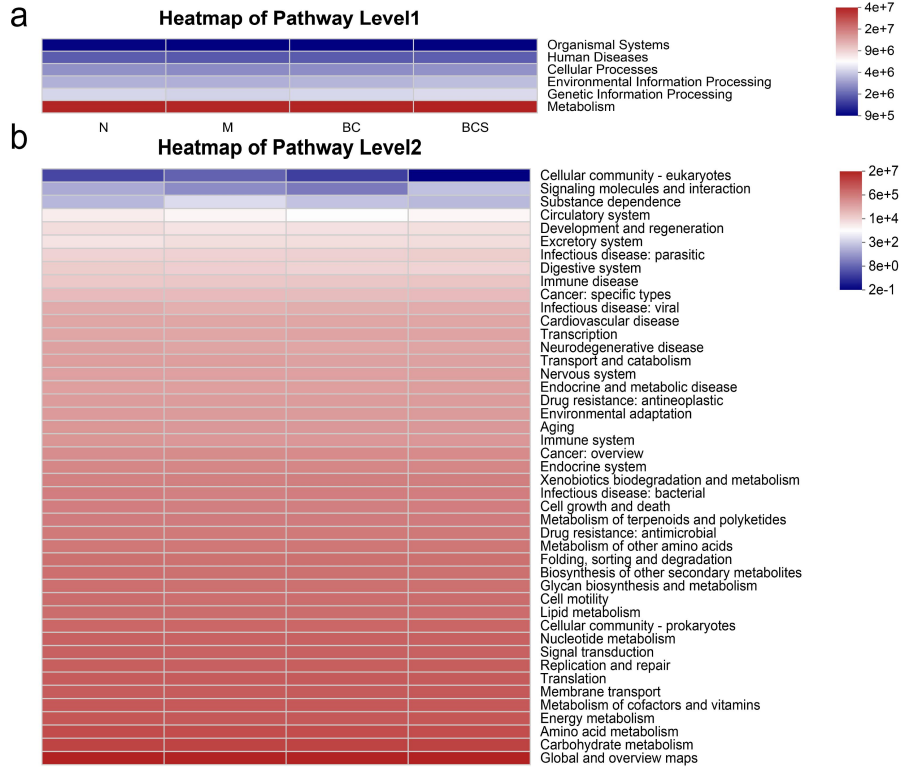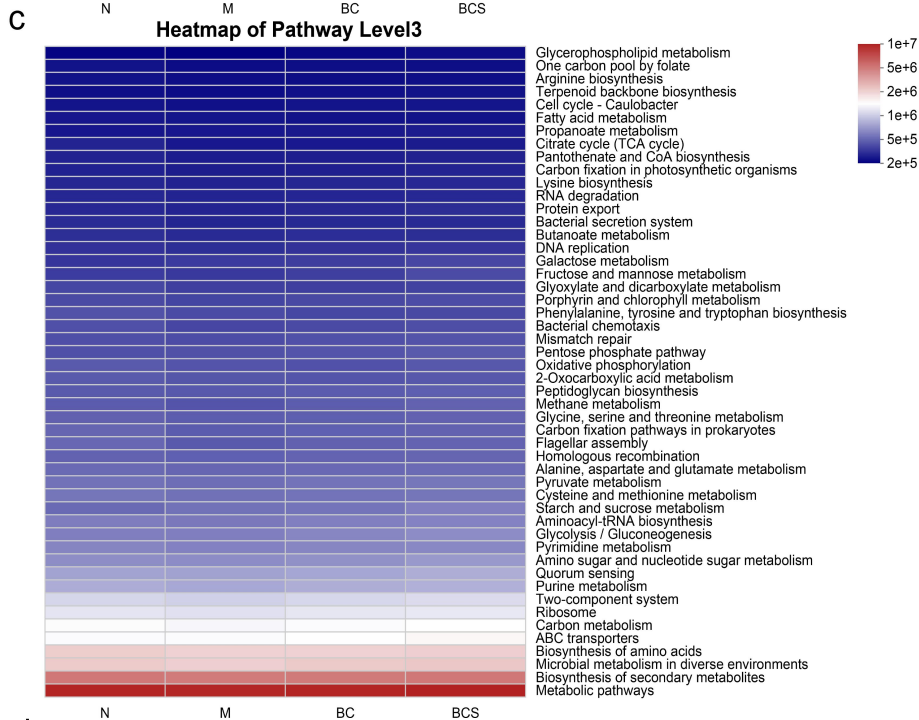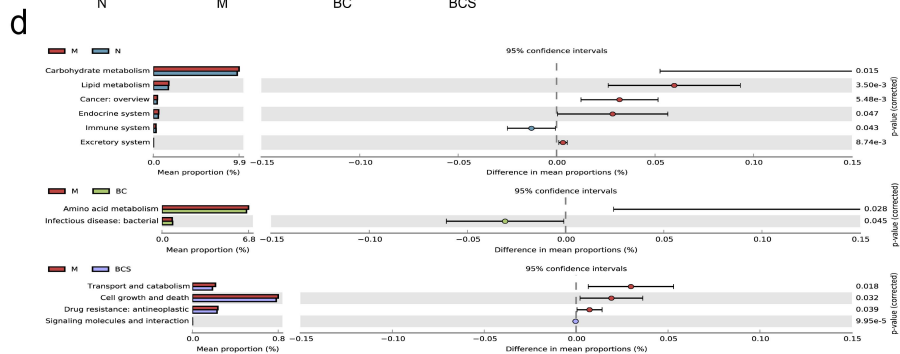

**Supplementary Fig. S6** The metabolic pathways in the gut microbiota basing the Kyoto Encyclopedia of Genes and Genomes (KEGG) database. (a) The heatmap of pathways level 1, (b) The heatmap of pathways level 2, (c) The heatmap of pathways level 3, and (d) STAMP analysis for the inferred level 2 metabolic pathway.

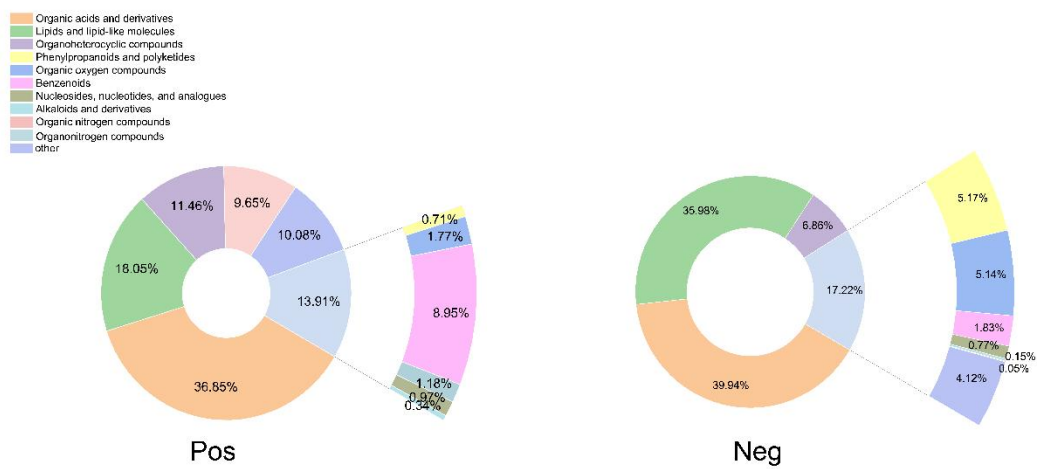

**Supplementary Fig. S7** The metabolites of *W. coagulans* BCG44 supernatant in superclass level under the positive and negative mode.
