# Supplementary material for: Immune-enhancing effect of Weizmannia coagulans BCG44 and its supernatant on cyclophosphamide-induced immunosuppressed mice and RAW264.7 cells via the modulation of the gut microbiota
Source: Royal Society of Chemistry journal article supplement (doi:10.1039/d4fo02452d), 2024-01-01
Supplement: d4fo02452d2.pdf [file d4fo02452d2.pdf]

**Supplementary Table**

**Supplementary Table S1** Primers used in the Quantitative Real-time PCR.

**Supplementary Table S2** Changes in Spleen index of the CTX-induced immunosuppressed mice

**Supplementary Table S3** Alpha diversity of gut microbiota.

**Supplementary Table S4** The co-abundance networks on the ASV level.

**Supplementary Table S5** The top 50 metabolites of *W. coagulans* BCG44 supernatant in both positive and negative ion modes ..

**Supplementary Table S1 Primers used in the Quantitative Real-time PCR**

| Gene           |                  | Sequence (5'-3')        |
|----------------|------------------|-------------------------|
| TLR4           | TLR4-F           | TCAGCAAAGTCCCTGATGACA   |
|                | TLR4-R           | CCTGGGGAAAACTCTGGATAG   |
| IL-10          | IL-10-F          | CTTACTGACTGGCATGAGGATCA |
|                | IL-10-R          | GCAGCTCTAGGAGCATGTGG    |
| IL-6           | IL-6-F           | CTGCAAGAGACTTCCATCCAG   |
|                | IL-6-R           | AGTGGTATAGACAGGTCTGTTGG |
| ZO-1           | ZO-1-F           | CATCTCCAGTCCCTTACCTTC   |
|                | ZO-1-R           | CCTCGGCTGACATTAGTTAC    |
| Occludin       | Occludin-F       | GAGCTTACAGGCAGAACTAGAC  |
|                | Occludin-R       | CAGCCATGTACTCTTCACTCTC  |
| $\beta$ -actin | $\beta$ -actin-F | GCCTCACTGTCCACCTTCCA    |
|                | $\beta$ -actin-R | GCAGCTCAGTAACAGTCCGCCT  |

**Supplementary Table S2 Changes in Spleen index of the CTX-induced immunosuppressed mice**

| Group        | N         | M         | BC        | BCS       |
|--------------|-----------|-----------|-----------|-----------|
| Spleen index | 3.16±0.18 | 1.32±0.03 | 1.90±0.27 | 1.87±0.17 |
|              |           | -58.12%#  | +43.74%*  | +41.51%*  |

#: For the spleen index of the M group compared with the N group:  $[(M - N)/N] * 100\%$ ; \*: For the spleen index of the BC and BCS groups compared with the M group:

$[(BC \text{ or } BCS - M)/M] * 100\%$

**Supplementary Table S3 Alpha diversity of gut microbiota**

| Group | Ace           | Chaos        | Shannon   | Simpson       | Coverage      | Sobs         | Pd          | ASVs         |
|-------|---------------|--------------|-----------|---------------|---------------|--------------|-------------|--------------|
| N     | 648.27±100.77 | 642.26±97.20 | 4.84±0.20 | 0.0346±0.0121 | 0.9992±0.0006 | 638.60±94.95 | 78.78±11.93 | 643.00±94.58 |
| M     | 742.67±97.42  | 735.65±93.86 | 5.21±0.21 | 0.0170±0.0044 | 0.9988±0.007  | 728.40±88.21 | 90.30±9.82  | 727.60±88.17 |
| BC    | 738.75±96.37  | 728.68±94.81 | 5.05±0.16 | 0.0260±0.0050 | 0.9984±0.0004 | 718.20±93.17 | 88.38±10.82 | 717.60±93.17 |
| BCS   | 709.21±96.79  | 701.28±93.49 | 4.93±0.28 | 0.0303±0.0126 | 0.9988±0.007  | 694.20±89.02 | 86.49±10.73 | 694.00±87.29 |

**Supplementary Table S4 The co-abundance networks on the ASV level**

| ASV     | Phylum              | Family                     | Genus                               | Moudle | Hub |
|---------|---------------------|----------------------------|-------------------------------------|--------|-----|
| ASV556  | p__Firmicutes       | f__Lactobacillaceae        | g__Lactobacillus                    | M1     | 0   |
| ASV88   | p__Firmicutes       | f__Bacillaceae             | g__Bacillus                         | M1     | 0   |
| ASV58   | p__Firmicutes       | f__Oscillospiraceae        | g__Colidextribacter                 | M1     | 0   |
| ASV107  | p__Firmicutes       | f__unclassified_c__Bacilli | g__unclassified_c__Bacilli          | M1     | 0   |
| ASV563  | p__Firmicutes       | f__Lachnospiraceae         | g__Lachnoclostridium                | M1     | 0   |
| ASV1584 | p__Firmicutes       | f__Lactobacillaceae        | g__Lactobacillus                    | M1     | 0   |
| ASV588  | p__Firmicutes       | f__Lachnospiraceae         | g__unclassified_f__Lachnospiraceae  | M1     | 0   |
| ASV101  | p__Firmicutes       | f__Oscillospiraceae        | g__unclassified_f__Oscillospiraceae | M1     | 0   |
| ASV557  | p__Firmicutes       | f__Oscillospiraceae        | g__Colidextribacter                 | M1     | 0   |
| ASV204  | p__Firmicutes       | f__Lachnospiraceae         | g__norank_f__Lachnospiraceae        | M1     | 0   |
| ASV608  | p__Firmicutes       | f__Bacillaceae             | g__Bacillus                         | M1     | 0   |
| ASV598  | p__Firmicutes       | f__Bacillaceae             | g__Bacillus                         | M1     | 0   |
| ASV231  | p__Actinobacteriota | f__Eggerthellaceae         | g__Enterorhabdus                    | M1     | 0   |
| ASV62   | p__Bacteroidota     | f__Muribaculaceae          | g__norank_f__Muribaculaceae         | M1     | 0   |
| ASV4247 | p__Firmicutes       | f__Lachnospiraceae         | g__Lachnospiraceae_UCG-006          | M1     | 0   |
| ASV2564 | p__Firmicutes       | f__Peptostreptococcaceae   | g__Romboutsia                       | M1     | 0   |
| ASV724  | p__Firmicutes       | f__norank_o__RF39          | g__norank_f__norank_o__RF39         | M1     | 0   |
| ASV94   | p__Firmicutes       | f__Oscillospiraceae        | g__norank_f__Oscillospiraceae       | M1     | 0   |
| ASV2232 | p__Firmicutes       | f__Lachnospiraceae         | g__unclassified_f__Lachnospiraceae  | M1     | 0   |

|          |                     |                                     |                                               |    |   |
|----------|---------------------|-------------------------------------|-----------------------------------------------|----|---|
| ASV735   | p__Desulfobacterota | f__Desulfovibrionaceae              | g__Desulfovibrio                              | M1 | 0 |
| ASV1656  | p__Firmicutes       | f__Ruminococcaceae                  | g__norank_f__Ruminococcaceae                  | M1 | 0 |
| ASV3689  | p__Firmicutes       | f__Lactobacillaceae                 | g__Lactobacillus                              | M1 | 0 |
| ASV320   | p__Actinobacteriota | f__Eggerthellaceae                  | g__Gordonibacter                              | M1 | 0 |
| ASV5447  | p__Bacteroidota     | f__Muribaculaceae                   | g__norank_f__Muribaculaceae                   | M1 | 0 |
| ASV1588  | p__Firmicutes       | f__Oscillospiraceae                 | g__Colidextribacter                           | M1 | 0 |
| ASV1857  | p__Firmicutes       | f__Oscillospiraceae                 | g__unclassified_f__Oscillospiraceae           | M1 | 0 |
| ASV202   | p__Firmicutes       | f__Lachnospiraceae                  | g__Marvinbryantia                             | M1 | 0 |
| ASV393   | p__Firmicutes       | f__Christensenellaceae              | g__Christensenellaceae_R-7_group              | M1 | 0 |
| ASV1082  | p__Firmicutes       | f__Lachnospiraceae                  | g__unclassified_f__Lachnospiraceae            | M1 | 0 |
| ASV1640  | p__Firmicutes       | f__UCG-010                          | g__norank_f__UCG-010                          | M1 | 0 |
| ASV6838  | p__Firmicutes       | f__Staphylococcaceae                | g__Jeotgalicoccus                             | M1 | 0 |
| ASV2829  | p__Firmicutes       | f__Ruminococcaceae                  | g__norank_f__Ruminococcaceae                  | M1 | 0 |
| ASV4269  | p__Firmicutes       | f__Enterococcaceae                  | g__Enterococcus                               | M1 | 0 |
| ASV1837  | p__Firmicutes       | f__Lachnospiraceae                  | g__unclassified_f__Lachnospiraceae            | M1 | 0 |
| ASV756   | p__Firmicutes       | f__Aerococcaceae                    | g__Aerococcus                                 | M1 | 0 |
| ASV1204  | p__Firmicutes       | f__Erysipelotrichaceae              | g__norank_f__Erysipelotrichaceae              | M1 | 0 |
| ASV11474 | p__Firmicutes       | f__Lactobacillaceae                 | g__Lactobacillus                              | M1 | 0 |
| ASV2261  | p__Firmicutes       | f__Staphylococcaceae                | g__Staphylococcus                             | M1 | 0 |
| ASV5648  | p__Firmicutes       | f__Lachnospiraceae                  | g__unclassified_f__Lachnospiraceae            | M1 | 0 |
| ASV2222  | p__Firmicutes       | f__norank_o__Clostridia_U<br>CG-014 | g__norank_f__norank_o__Clostridia<br>_UCG-014 | M1 | 0 |

|         |                 |                                        |                                                  |    |   |
|---------|-----------------|----------------------------------------|--------------------------------------------------|----|---|
| ASV1241 | p__Firmicutes   | f__Monoglobaceae                       | g__Monoglobus                                    | M1 | 0 |
| ASV416  | p__Firmicutes   | f__norank_o_RF39                       | g__norank_f__norank_o_RF39                       | M1 | 0 |
| ASV3729 | p__Firmicutes   | f__Ruminococcaceae                     | g__norank_f__Ruminococcaceae                     | M1 | 0 |
| ASV99   | p__Bacteroidota | f__Tannerellaceae                      | g__Parabacteroides                               | M2 | 0 |
| ASV28   | p__Bacteroidota | f__Bacteroidaceae                      | g__Bacteroides                                   | M2 | 0 |
| ASV18   | p__Bacteroidota | f__Tannerellaceae                      | g__Parabacteroides                               | M2 | 0 |
| ASV117  | p__Firmicutes   | f__Lachnospiraceae                     | g__Lachnoclostridium                             | M2 | 0 |
| ASV115  | p__Firmicutes   | f__Lachnospiraceae                     | g__unclassified_f__Lachnospiraceae               | M2 | 0 |
| ASV44   | p__Bacteroidota | f__Bacteroidaceae                      | g__Bacteroides                                   | M2 | 0 |
| ASV66   | p__Firmicutes   | f__Acholeplasmataceae                  | g__Anaeroplasma                                  | M2 | 0 |
| ASV804  | p__Bacteroidota | f__Bacteroidaceae                      | g__Bacteroides                                   | M2 | 0 |
| ASV79   | p__Bacteroidota | f__Muribaculaceae                      | g__Muribaculum                                   | M2 | 0 |
| ASV36   | p__Bacteroidota | f__Muribaculaceae                      | g__norank_f__Muribaculaceae                      | M2 | 0 |
| ASV59   | p__Firmicutes   | f__Oscillospiraceae                    | g__UCG-003                                       | M2 | 0 |
| ASV174  | p__Firmicutes   | f__Lachnospiraceae                     | g__unclassified_f__Lachnospiraceae               | M2 | 0 |
| ASV680  | p__Firmicutes   | f__Lachnospiraceae                     | g__Lachnospiraceae_NK4A136_group                 | M2 | 0 |
| ASV639  | p__Bacteroidota | f__Muribaculaceae                      | g__norank_f__Muribaculaceae                      | M2 | 0 |
| ASV132  | p__Firmicutes   | f__Eubacterium_coprostanoligenes_group | g__norank_f__Eubacterium_coprostanoligenes_group | M2 | 0 |
| ASV130  | p__Firmicutes   | f__Oscillospiraceae                    | g__Oscillibacter                                 | M2 | 0 |
| ASV1052 | p__Bacteroidota | f__Muribaculaceae                      | g__norank_f__Muribaculaceae                      | M2 | 0 |

|         |                 |                                     |                                               |    |          |
|---------|-----------------|-------------------------------------|-----------------------------------------------|----|----------|
| ASV145  | p__Firmicutes   | f__Oscillospiraceae                 | g__unclassified_f__Oscillospiraceae           | M2 | 0        |
| ASV1060 | p__Bacteroidota | f__Muribaculaceae                   | g__norank_f__Muribaculaceae                   | M2 | 0        |
| ASV430  | p__Firmicutes   | f__Ruminococcaceae                  | g__unclassified_f__Ruminococcaceae            | M2 | 0        |
|         |                 |                                     | e                                             |    |          |
| ASV128  | p__Firmicutes   | f__Ruminococcaceae                  | g__Ruminococcus                               | M2 | 0        |
| ASV206  | p__Bacteroidota | f__Muribaculaceae                   | g__Muribaculum                                | M2 | 0        |
| ASV200  | p__Bacteroidota | f__Muribaculaceae                   | g__norank_f__Muribaculaceae                   | M2 | 0        |
| ASV1079 | p__Firmicutes   | f__Lachnospiraceae                  | g__unclassified_f__Lachnospiraceae            | M2 | 0        |
| ASV1054 | p__Firmicutes   | f__Lachnospiraceae                  | g__Marvinbryantia                             | M2 | 0        |
| ASV616  | p__Bacteroidota | f__Rikenellaceae                    | g__Alistipes                                  | M2 | 0        |
| ASV1595 | p__Firmicutes   | f__Lachnospiraceae                  | g__unclassified_f__Lachnospiraceae            | M2 | 0        |
| ASV597  | p__Bacteroidota | f__Rikenellaceae                    | g__Alistipes                                  | M2 | 0        |
| ASV1059 | p__Firmicutes   | f__norank_o__Clostridia_U<br>CG-014 | g__norank_f__norank_o__Clostridia<br>_UCG-014 | M2 | 0        |
| ASV1090 | p__Bacteroidota | f__Muribaculaceae                   | g__norank_f__Muribaculaceae                   | M2 | 0        |
| ASV254  | p__Bacteroidota | f__Rikenellaceae                    | g__Rikenella                                  | M2 | 0        |
| ASV241  | p__Bacteroidota | f__Bacteroidaceae                   | g__Bacteroides                                | M2 | 0        |
| ASV718  | p__Firmicutes   | f__Oscillospiraceae                 | g__unclassified_f__Oscillospiraceae           | M2 | 0        |
| ASV1058 | p__Firmicutes   | f__Oscillospiraceae                 | g__Oscillibacter                              | M2 | 0.000001 |
| ASV176  | p__Firmicutes   | f__norank_o__Clostridia_U<br>CG-014 | g__norank_f__norank_o__Clostridia<br>_UCG-014 | M2 | 0        |
| ASV1234 | p__Firmicutes   | f__Anaerovoracaceae                 | g__Family_XIII_AD3011_group                   | M2 | 0        |



|         |                     |                                         |                                                   |    |          |
|---------|---------------------|-----------------------------------------|---------------------------------------------------|----|----------|
| ASV764  | p__Firmicutes       | f__Lachnospiraceae                      | g__norank_f__Lachnospiraceae                      | M2 | 0        |
| ASV1066 | p__Firmicutes       | f__norank_o__Clostridia_vadinBB60_group | g__norank_f__norank_o__Clostridia_vadinBB60_group | M2 | 0        |
| ASV1105 | p__Firmicutes       | f__norank_o__Clostridia_vadinBB60_group | g__norank_f__norank_o__Clostridia_vadinBB60_group | M2 | 0        |
| ASV5    | p__Bacteroidota     | f__Muribaculaceae                       | g__norank_f__Muribaculaceae                       | M3 | 0        |
| ASV4    | p__Bacteroidota     | f__Muribaculaceae                       | g__norank_f__Muribaculaceae                       | M3 | 0        |
| ASV20   | p__Bacteroidota     | f__Muribaculaceae                       | g__norank_f__Muribaculaceae                       | M3 | 0        |
| ASV50   | p__Firmicutes       | f__Lachnospiraceae                      | g__Blautia                                        | M3 | 0        |
| ASV39   | p__Bacteroidota     | f__Muribaculaceae                       | g__norank_f__Muribaculaceae                       | M3 | 0.000001 |
| ASV38   | p__Firmicutes       | f__Lachnospiraceae                      | g__Lachnospiraceae_NK4A136_group                  | M3 | 0        |
| ASV165  | p__Deferribacterota | f__Deferribacteraceae                   | g__Mucispirillum                                  | M3 | 0        |
| ASV104  | p__Deferribacterota | f__Deferribacteraceae                   | g__Mucispirillum                                  | M3 | 0        |
| ASV811  | p__Bacteroidota     | f__Bacteroidaceae                       | g__Bacteroides                                    | M3 | 0        |
| ASV1855 | p__Bacteroidota     | f__Rikenellaceae                        | g__Alistipes                                      | M3 | 0        |
| ASV573  | p__Firmicutes       | f__Lachnospiraceae                      | g__Lachnospiraceae_NK4A136_group                  | M3 | 0        |
| ASV141  | p__Bacteroidota     | f__Muribaculaceae                       | g__norank_f__Muribaculaceae                       | M3 | 0        |
| ASV123  | p__Bacteroidota     | f__Muribaculaceae                       | g__norank_f__Muribaculaceae                       | M3 | 0        |
| ASV199  | p__Firmicutes       | f__Lachnospiraceae                      | g__unclassified_f__Lachnospiraceae                | M3 | 0        |
| ASV5442 | p__Firmicutes       | f__Lachnospiraceae                      | g__unclassified_f__Lachnospiraceae                | M3 | 0        |

|          |                     |                                        |                                                  |    |          |
|----------|---------------------|----------------------------------------|--------------------------------------------------|----|----------|
| ASV1111  | p__Deferribacterota | f__Deferribacteraceae                  | g__Mucispirillum                                 | M3 | 0        |
| ASV10017 | p__Firmicutes       | f__Eubacterium_coprostanoligenes_group | g__norank_f__Eubacterium_coprostanoligenes_group | M3 | 0        |
| ASV791   | p__Bacteroidota     | f__Rikenellaceae                       | g__Alistipes                                     | M3 | 0        |
| ASV276   | p__Bacteroidota     | f__Bacteroidaceae                      | g__Bacteroides                                   | M3 | 0.000004 |
| ASV279   | p__Bacteroidota     | f__Muribaculaceae                      | g__norank_f__Muribaculaceae                      | M3 | 0        |
| ASV10018 | p__Firmicutes       | f__Lachnospiraceae                     | g__unclassified_f__Lachnospiraceae               | M3 | 0        |
| ASV1883  | p__Firmicutes       | f__Lachnospiraceae                     | g__Roseburia                                     | M3 | 0        |
| ASV663   | p__Firmicutes       | f__Lachnospiraceae                     | g__unclassified_f__Lachnospiraceae               | M3 | 0        |
| ASV2798  | p__Firmicutes       | f__Oscillospiraceae                    | g__norank_f__Oscillospiraceae                    | M3 | 0        |
| ASV1604  | p__Firmicutes       | f__Lachnospiraceae                     | g__unclassified_f__Lachnospiraceae               | M3 | 0        |
| ASV292   | p__Firmicutes       | f__Christensenellaceae                 | g__Christensenellaceae_R-7_group                 | M3 | 0        |
| ASV5470  | p__Bacteroidota     | f__Muribaculaceae                      | g__norank_f__Muribaculaceae                      | M3 | 0        |
| ASV2299  | p__Proteobacteria   | f__norank_o__Rhodospirillales          | g__norank_f__norank_o__Rhodospirillales          | M3 | 0        |
| ASV4033  | p__Firmicutes       | f__Oscillospiraceae                    | g__unclassified_f__Oscillospiraceae              | M3 | 0        |
| ASV10019 | p__Firmicutes       | f__Lachnospiraceae                     | g__unclassified_f__Lachnospiraceae               | M3 | 0        |
| ASV2541  | p__Cyanobacteria    | f__norank_o__Gastranaerophilales       | g__norank_f__norank_o__Gastranaerophilales       | M3 | 0        |
| ASV10020 | p__Firmicutes       | f__Lachnospiraceae                     | g__unclassified_f__Lachnospiraceae               | M3 | 0        |
| ASV4262  | p__Firmicutes       | f__Lachnospiraceae                     | g__unclassified_f__Lachnospiraceae               | M3 | 0        |
| ASV2795  | p__Firmicutes       | f__Lachnospiraceae                     | g__unclassified_f__Lachnospiraceae               | M3 | 0        |

---

|         |                   |                               |                                         |    |   |
|---------|-------------------|-------------------------------|-----------------------------------------|----|---|
| ASV2800 | p__Firmicutes     | f__Lachnospiraceae            | g__Lachnospiraceae_NK4A136_gro<br>up    | M3 | 0 |
| ASV3424 | p__Bacteroidota   | f__Bacteroidaceae             | g__Bacteroides                          | M3 | 0 |
| ASV1    | p__Firmicutes     | f__Lachnospiraceae            | g__Lachnospiraceae_UCG-006              | M4 | 0 |
| ASV51   | p__Firmicutes     | f__Lachnospiraceae            | g__unclassified_f__Lachnospiraceae      | M4 | 0 |
| ASV26   | p__Bacteroidota   | f__Muribaculaceae             | g__norank_f__Muribaculaceae             | M4 | 0 |
| ASV558  | p__Firmicutes     | f__Lachnospiraceae            | g__Lachnospiraceae_NK4A136_gro<br>up    | M4 | 0 |
| ASV21   | p__Firmicutes     | f__Lachnospiraceae            | g__unclassified_f__Lachnospiraceae      | M4 | 0 |
| ASV16   | p__Firmicutes     | f__Lachnospiraceae            | g__unclassified_f__Lachnospiraceae      | M4 | 0 |
| ASV203  | p__Firmicutes     | f__Lachnospiraceae            | g__unclassified_f__Lachnospiraceae      | M4 | 0 |
| ASV334  | p__Firmicutes     | f__Oscillospiraceae           | g__unclassified_f__Oscillospiraceae     | M4 | 0 |
| ASV2154 | p__Firmicutes     | f__Lachnospiraceae            | g__unclassified_f__Lachnospiraceae      | M4 | 0 |
| ASV108  | p__Firmicutes     | f__Lachnospiraceae            | g__Roseburia                            | M4 | 0 |
| ASV1646 | p__Firmicutes     | f__Lachnospiraceae            | g__unclassified_f__Lachnospiraceae      | M4 | 0 |
| ASV2163 | p__Firmicutes     | f__Lachnospiraceae            | g__unclassified_f__Lachnospiraceae      | M4 | 0 |
| ASV1505 | p__Proteobacteria | f__norank_o__Rhodospirillales | g__norank_f__norank_o__Rhodospirillales | M4 | 0 |
| ASV1596 | p__Firmicutes     | f__Lachnospiraceae            | g__Lachnoclostridium                    | M4 | 0 |
| ASV651  | p__Firmicutes     | f__Lachnospiraceae            | g__Roseburia                            | M4 | 0 |
| ASV1644 | p__Firmicutes     | f__Lachnospiraceae            | g__unclassified_f__Lachnospiraceae      | M4 | 0 |
| ASV610  | p__Firmicutes     | f__Lachnospiraceae            | g__unclassified_f__Lachnospiraceae      | M4 | 0 |

---

|         |                                       |                                       |                                           |    |   |
|---------|---------------------------------------|---------------------------------------|-------------------------------------------|----|---|
| ASV2160 | p__Firmicutes                         | f__Lachnospiraceae                    | g__unclassified_f__Lachnospiraceae        | M4 | 0 |
| ASV1622 | p__Firmicutes                         | f__Lachnospiraceae                    | g__unclassified_f__Lachnospiraceae        | M4 | 0 |
| ASV2161 | p__Firmicutes                         | f__Oscillospiraceae                   | g__Colidextribacter                       | M4 | 0 |
| ASV3706 | p__Firmicutes                         | f__Lachnospiraceae                    | g__Lachnospiraceae_NK4A136_group          | M4 | 0 |
| ASV214  | p__Firmicutes                         | f__Lachnospiraceae                    | g__unclassified_f__Lachnospiraceae        | M4 | 0 |
| ASV2176 | p__Firmicutes                         | f__Lachnospiraceae                    | g__unclassified_f__Lachnospiraceae        | M4 | 0 |
| ASV3699 | p__Firmicutes                         | f__Oscillospiraceae                   | g__Colidextribacter                       | M4 | 0 |
| ASV2162 | p__Firmicutes                         | f__Lachnospiraceae                    | g__unclassified_f__Lachnospiraceae        | M4 | 0 |
| ASV2165 | p__Firmicutes                         | f__norank_o__Clostridia_UCG-014       | g__norank_f__norank_o__Clostridia_UCG-014 | M4 | 0 |
| ASV4281 | p__Firmicutes                         | f__unclassified_o__Oscillospirales    | g__unclassified_o__Oscillospirales        | M4 | 0 |
| ASV363  | p__Firmicutes                         | f__Lachnospiraceae                    | g__unclassified_f__Lachnospiraceae        | M4 | 0 |
| ASV3691 | p__Firmicutes                         | f__Oscillospiraceae                   | g__unclassified_f__Oscillospiraceae       | M4 | 0 |
| ASV2168 | p__Firmicutes                         | f__Ruminococcaceae                    | g__unclassified_f__Ruminococcaceae        | M4 | 0 |
| ASV1353 | p__unclassified_k__norank_d__Bacteria | f__unclassified_k__norank_d__Bacteria | g__unclassified_k__norank_d__Bacteria     | M4 | 0 |
| ASV2172 | p__Firmicutes                         | f__Lachnospiraceae                    | g__unclassified_f__Lachnospiraceae        | M4 | 0 |
| ASV2159 | p__Firmicutes                         | f__Lachnospiraceae                    | g__unclassified_f__Lachnospiraceae        | M4 | 0 |
| ASV227  | p__Desulfobacterota                   | f__Desulfovibrionaceae                | g__Desulfovibrio                          | M5 | 0 |

|         |                    |                                     |                                               |    |          |
|---------|--------------------|-------------------------------------|-----------------------------------------------|----|----------|
| ASV646  | p__Bacteroidota    | f__Muribaculaceae                   | g__norank_f__Muribaculaceae                   | M5 | 0        |
| ASV1063 | p__Firmicutes      | f__Lachnospiraceae                  | g__Lachnospiraceae_NK4A136_gro<br>up          | M5 | 0.000002 |
| ASV122  | p__Firmicutes      | f__Lachnospiraceae                  | g__Lachnospiraceae_NK4A136_gro<br>up          | M5 | 0        |
| ASV140  | p__Bacteroidota    | f__Rikenellaceae                    | g__Alistipes                                  | M5 | 0        |
| ASV744  | p__Firmicutes      | f__Ruminococcaceae                  | g__Ruminococcus                               | M5 | 0        |
| ASV729  | p__Firmicutes      | f__Lachnospiraceae                  | g__Roseburia                                  | M5 | 0        |
| ASV113  | p__Firmicutes      | f__Lachnospiraceae                  | g__Lachnospiraceae_NK4A136_gro<br>up          | M5 | 0        |
| ASV85   | p__Firmicutes      | f__Lachnospiraceae                  | g__GCA-900066575                              | M5 | 0        |
| ASV1064 | p__Patescibacteria | f__Saccharimonadaceae               | g__Candidatus_Saccharimonas                   | M5 | 0        |
| ASV3392 | p__Firmicutes      | f__Lachnospiraceae                  | g__Lachnospiraceae_NK4A136_gro<br>up          | M5 | 0.000002 |
| ASV3391 | p__Firmicutes      | f__Lachnospiraceae                  | g__unclassified_f__Lachnospiraceae            | M5 | 0        |
| ASV2251 | p__Firmicutes      | f__Oscillospiraceae                 | g__unclassified_f__Oscillospiraceae           | M5 | 0        |
| ASV2470 | p__Firmicutes      | f__Lachnospiraceae                  | g__unclassified_f__Lachnospiraceae            | M5 | 0.000001 |
| ASV732  | p__Firmicutes      | f__norank_o__Clostridia_U<br>CG-014 | g__norank_f__norank_o__Clostridia<br>_UCG-014 | M5 | 0        |
| ASV3396 | p__Firmicutes      | f__Lachnospiraceae                  | g__Lachnospiraceae_NK4A136_gro<br>up          | M5 | 0.000018 |
| ASV1202 | p__Firmicutes      | f__Lachnospiraceae                  | g__Lachnospiraceae_NK4A136_gro                | M5 | 0        |

---

|         |                     |                                     |                                               |    |          |
|---------|---------------------|-------------------------------------|-----------------------------------------------|----|----------|
|         |                     |                                     | up                                            |    |          |
| ASV2302 | p__Firmicutes       | f__Lachnospiraceae                  | g__Roseburia                                  | M5 | 0        |
| ASV3395 | p__Firmicutes       | f__Lachnospiraceae                  | g__unclassified_f__Lachnospiraceae            | M5 | 0        |
| ASV3400 | p__Firmicutes       | f__Lachnospiraceae                  | g__Lachnospiraceae_NK4A136_gro                | M5 | 0.000012 |
|         |                     |                                     | up                                            |    |          |
| ASV1690 | p__Firmicutes       | f__Lachnospiraceae                  | g__Lachnospiraceae_NK4A136_gro                | M5 | 0.000002 |
|         |                     |                                     | up                                            |    |          |
| ASV341  | p__Actinobacteriota | f__Eggerthellaceae                  | g__unclassified_f__Eggerthellaceae            | M5 | 0        |
| ASV353  | p__Patescibacteria  | f__Saccharimonadaceae               | g__Candidatus_Saccharimonas                   | M5 | 0        |
| ASV2851 | p__Firmicutes       | f__Lachnospiraceae                  | g__unclassified_f__Lachnospiraceae            | M5 | 0        |
| ASV3393 | p__Firmicutes       | f__Lachnospiraceae                  | g__unclassified_f__Lachnospiraceae            | M5 | 0        |
| ASV3406 | p__Firmicutes       | f__norank_o__Clostridia_U<br>CG-014 | g__norank_f__norank_o__Clostridia<br>_UCG-014 | M5 | 0        |
| ASV3394 | p__Firmicutes       | f__Lachnospiraceae                  | g__unclassified_f__Lachnospiraceae            | M5 | 0        |
| ASV116  | p__Firmicutes       | f__Lachnospiraceae                  | g__Blautia                                    | M6 | 0        |
| ASV1921 | p__Firmicutes       | f__Lachnospiraceae                  | g__Blautia                                    | M6 | 0        |
| ASV568  | p__Firmicutes       | f__Lachnospiraceae                  | g__Roseburia                                  | M6 | 0        |
| ASV685  | p__Firmicutes       | f__Lachnospiraceae                  | g__unclassified_f__Lachnospiraceae            | M6 | 0        |
| ASV1618 | p__Firmicutes       | f__Oscillospiraceae                 | g__Oscillibacter                              | M6 | 0        |
| ASV2155 | p__Firmicutes       | f__Lachnospiraceae                  | g__Roseburia                                  | M6 | 0        |
| ASV649  | p__Desulfobacterota | f__Desulfovibrionaceae              | g__Bilophila                                  | M6 | 0        |
| ASV1071 | p__Firmicutes       | f__Lachnospiraceae                  | g__unclassified_f__Lachnospiraceae            | M6 | 0        |

---

|          |                     |                               |                                     |    |   |
|----------|---------------------|-------------------------------|-------------------------------------|----|---|
| ASV248   | p__Firmicutes       | f__Oscillospiraceae           | g__unclassified_f__Oscillospiraceae | M6 | 0 |
| ASV574   | p__Bacteroidota     | f__Muribaculaceae             | g__norank_f__Muribaculaceae         | M6 | 0 |
| ASV11223 | p__Firmicutes       | f__Lachnospiraceae            | g__unclassified_f__Lachnospiraceae  | M6 | 0 |
| ASV1846  | p__Firmicutes       | f__Oscillospiraceae           | g__Colidextribacter                 | M6 | 0 |
| ASV1148  | p__Firmicutes       | f__Lachnospiraceae            | g__Roseburia                        | M6 | 0 |
| ASV630   | p__Firmicutes       | f__Lachnospiraceae            | g__unclassified_f__Lachnospiraceae  | M6 | 0 |
| ASV1829  | p__Firmicutes       | f__Lachnospiraceae            | g__Lachnospiraceae_NK4A136_group    | M6 | 0 |
| ASV2530  | p__Firmicutes       | f__Lachnospiraceae            | g__A2                               | M6 | 0 |
| ASV1647  | p__Firmicutes       | f__Lachnospiraceae            | g__A2                               | M6 | 0 |
| ASV611   | p__Firmicutes       | f__Lachnospiraceae            | g__Acetatifactor                    | M6 | 0 |
| ASV677   | p__Firmicutes       | f__Lachnospiraceae            | g__Roseburia                        | M6 | 0 |
| ASV3445  | p__Firmicutes       | f__Lachnospiraceae            | g__Roseburia                        | M6 | 0 |
| ASV1088  | p__Firmicutes       | f__Lachnospiraceae            | g__Acetatifactor                    | M6 | 0 |
| ASV2821  | p__Firmicutes       | f__Oscillospiraceae           | g__norank_f__Oscillospiraceae       | M6 | 0 |
| ASV12070 | p__Firmicutes       | f__Lachnospiraceae            | g__unclassified_f__Lachnospiraceae  | M6 | 0 |
| ASV12068 | p__Firmicutes       | f__unclassified_c__Clostridia | g__unclassified_c__Clostridia       | M6 | 0 |
| ASV25    | p__Actinobacteriota | f__Bifidobacteriaceae         | g__Bifidobacterium                  | M7 | 0 |
| ASV13    | p__Actinobacteriota | f__Bifidobacteriaceae         | g__Bifidobacterium                  | M7 | 0 |
| ASV77    | p__Firmicutes       | f__Erysipelotrichaceae        | g__Faecalibaculum                   | M7 | 0 |
| ASV305   | p__Firmicutes       | f__Oscillospiraceae           | g__norank_f__Oscillospiraceae       | M7 | 0 |

|         |                      |                                            |                                                      |    |   |
|---------|----------------------|--------------------------------------------|------------------------------------------------------|----|---|
| ASV23   | p__Actinobacteriota  | f__Bifidobacteriaceae                      | g__Bifidobacterium                                   | M7 | 0 |
| ASV93   | p__Bacteroidota      | f__Muribaculaceae                          | g__norank_f__Muribaculaceae                          | M7 | 0 |
| ASV100  | p__Firmicutes        | f__Eubacterium_coprostanol<br>igenes_group | g__norank_f__Eubacterium_coprost<br>anoligenes_group | M7 | 0 |
| ASV2    | p__Verrucomicrobiota | f__Akkermansiaceae                         | g__Akkermansia                                       | M7 | 0 |
| ASV192  | p__Actinobacteriota  | f__Eggerthellaceae                         | g__Enterorhabdus                                     | M7 | 0 |
| ASV211  | p__Firmicutes        | f__Lachnospiraceae                         | g__unclassified_f__Lachnospiraceae                   | M7 | 0 |
| ASV591  | p__Actinobacteriota  | f__Eggerthellaceae                         | g__Enterorhabdus                                     | M7 | 0 |
| ASV205  | p__Actinobacteriota  | f__Eggerthellaceae                         | g__Enterorhabdus                                     | M7 | 0 |
| ASV216  | p__Actinobacteriota  | f__Eggerthellaceae                         | g__Enterorhabdus                                     | M7 | 0 |
| ASV6366 | p__Firmicutes        | f__Lachnospiraceae                         | g__unclassified_f__Lachnospiraceae                   | M7 | 0 |
| ASV5474 | p__Firmicutes        | f__Lachnospiraceae                         | g__unclassified_f__Lachnospiraceae                   | M7 | 0 |
| ASV596  | p__Actinobacteriota  | f__Eggerthellaceae                         | g__Enterorhabdus                                     | M7 | 0 |
| ASV659  | p__Actinobacteriota  | f__Eggerthellaceae                         | g__Parvibacter                                       | M7 | 0 |
| ASV263  | p__Firmicutes        | f__norank_o__Clostridia_U<br>CG-014        | g__norank_f__norank_o__Clostridia<br>_UCG-014        | M7 | 0 |
| ASV179  | p__Firmicutes        | f__norank_o__Clostridia_U<br>CG-014        | g__norank_f__norank_o__Clostridia<br>_UCG-014        | M7 | 0 |
| ASV1067 | p__Firmicutes        | f__Eubacterium_coprostanol<br>igenes_group | g__norank_f__Eubacterium_coprost<br>anoligenes_group | M7 | 0 |
| ASV81   | p__Firmicutes        | f__norank_o__Clostridia_U<br>CG-014        | g__norank_f__norank_o__Clostridia<br>_UCG-014        | M7 | 0 |



|         |                   |                                        |                                                  |    |          |
|---------|-------------------|----------------------------------------|--------------------------------------------------|----|----------|
| ASV6367 | p__Firmicutes     | f__Erysipelotrichaceae                 | g__Dubosiella                                    | M7 | 0        |
| ASV2487 | p__Bacteroidota   | f__Muribaculaceae                      | g__norank_f__Muribaculaceae                      | M7 | 0        |
| ASV6368 | p__Firmicutes     | f__Erysipelotrichaceae                 | g__Dubosiella                                    | M7 | 0        |
| ASV627  | p__Firmicutes     | f__Lachnospiraceae                     | g__unclassified_f__Lachnospiraceae               | M8 | 0.115023 |
| ASV1109 | p__Firmicutes     | f__Lachnospiraceae                     | g__Lachnospiraceae_NK4A136_group                 | M8 | 0.201582 |
| ASV250  | p__Firmicutes     | f__Lactobacillaceae                    | g__Lactobacillus                                 | M8 | 0.230271 |
| ASV54   | p__Firmicutes     | f__Lachnospiraceae                     | g__unclassified_f__Lachnospiraceae               | M8 | 0.230273 |
| ASV625  | p__Firmicutes     | f__Lachnospiraceae                     | g__unclassified_f__Lachnospiraceae               | M8 | 0.220413 |
| ASV2823 | p__Proteobacteria | f__Comamonadaceae                      | g__Comamonas                                     | M8 | 0.235584 |
| ASV549  | p__Firmicutes     | f__Ruminococcaceae                     | g__unclassified_f__Ruminococcaceae               | M8 | 0.199056 |
| ASV567  | p__Firmicutes     | f__Lachnospiraceae                     | g__unclassified_f__Lachnospiraceae               | M8 | 0.235584 |
| ASV2839 | p__Proteobacteria | f__Caulobacteraceae                    | g__Brevundimonas                                 | M8 | 0.229617 |
| ASV8675 | p__Firmicutes     | f__Lachnospiraceae                     | g__Lachnospiraceae_NK4A136_group                 | M8 | 0.220538 |
| ASV1123 | p__Firmicutes     | f__Lachnospiraceae                     | g__A2                                            | M8 | 0.177419 |
| ASV5446 | p__Firmicutes     | f__Lachnospiraceae                     | g__Roseburia                                     | M8 | 0.175012 |
| ASV2878 | p__Proteobacteria | f__Devosiaceae                         | g__Devosia                                       | M8 | 0.235584 |
| ASV2224 | p__Firmicutes     | f__Lachnospiraceae                     | g__unclassified_f__Lachnospiraceae               | M8 | 0.0126   |
| ASV5188 | p__Firmicutes     | f__Eubacterium_coprostanoligenes_group | g__norank_f__Eubacterium_coprostanoligenes_group | M8 | 0.226505 |

|          |                     |                           |                                      |    |          |
|----------|---------------------|---------------------------|--------------------------------------|----|----------|
| ASV2863  | p__Proteobacteria   | f__Caulobacteraceae       | g__Brevundimonas                     | M8 | 0.235584 |
| ASV7383  | p__Firmicutes       | f__Lachnospiraceae        | g__norank_f__Lachnospiraceae         | M8 | 0.235584 |
| ASV10028 | p__Firmicutes       | f__Lachnospiraceae        | g__Lachnospiraceae_UCG-001           | M8 | 0.229617 |
| ASV13368 | p__Firmicutes       | f__Lachnospiraceae        | g__unclassified_f__Lachnospiraceae   | M8 | 0.226505 |
| ASV6757  | p__Proteobacteria   | f__Devosiaceae            | g__Devosia                           | M8 | 0.235584 |
| ASV6383  | p__Firmicutes       | f__Ruminococcaceae        | g__norank_f__Ruminococcaceae         | M8 | 0.210086 |
| ASV10081 | p__Firmicutes       | f__Carnobacteriaceae      | g__Atopostipes                       | M8 | 0.235584 |
| ASV645   | p__Firmicutes       | f__Lachnospiraceae        | g__Acetatifactor                     | M9 | 0        |
| ASV137   | p__Firmicutes       | f__Lachnospiraceae        | g__unclassified_f__Lachnospiraceae   | M9 | 0        |
| ASV1602  | p__Firmicutes       | f__Lachnospiraceae        | g__unclassified_f__Lachnospiraceae   | M9 | 0        |
| ASV233   | p__Firmicutes       | f__Oscillospiraceae       | g__unclassified_f__Oscillospiraceae  | M9 | 0        |
| ASV437   | p__Bacteroidota     | f__Tannerellaceae         | g__Parabacteroides                   | M9 | 0        |
| ASV2170  | p__Firmicutes       | f__Lachnospiraceae        | g__unclassified_f__Lachnospiraceae   | M9 | 0        |
| ASV2158  | p__Firmicutes       | f__Lachnospiraceae        | g__Lachnospiraceae_NK4A136_gro<br>up | M9 | 0        |
| ASV4692  | p__Desulfobacterota | f__Desulfovibrionaceae    | g__norank_f__Desulfovibrionaceae     | M9 | 0        |
| ASV9306  | p__Firmicutes       | f__Lachnospiraceae        | g__Lachnospiraceae_NK4A136_gro<br>up | M9 | 0        |
| ASV3409  | p__Firmicutes       | f__Lachnospiraceae        | g__unclassified_f__Lachnospiraceae   | M9 | 0        |
| ASV4254  | p__Firmicutes       | f__Lachnospiraceae        | g__unclassified_f__Lachnospiraceae   | M9 | 0        |
| ASV1168  | p__Firmicutes       | f__Lachnospiraceae        | g__Acetatifactor                     | M9 | 0        |
| ASV4242  | p__Firmicutes       | f__norank_o__Clostridia_U | g__norank_f__norank_o__Clostridia    | M9 | 0        |

|          |                    | CG-014                             | _UCG-014                                |     |          |
|----------|--------------------|------------------------------------|-----------------------------------------|-----|----------|
| ASV2580  | p__Firmicutes      | f__Ruminococcaceae                 | g__UBA1819                              | M9  | 0        |
| ASV9307  | p__Firmicutes      | f__unclassified_c__Clostridia<br>a | g__unclassified_c__Clostridia           | M9  | 0        |
| ASV8180  | p__Firmicutes      | f__Oscillospiraceae                | g__unclassified_f__Oscillospiraceae     | M9  | 0        |
| ASV2542  | p__Patescibacteria | f__Saccharimonadaceae              | g__Candidatus_Saccharimonas             | M9  | 0        |
| ASV9308  | p__Firmicutes      | f__Lachnospiraceae                 | g__norank_f__Lachnospiraceae            | M9  | 0        |
| ASV6398  | p__Firmicutes      | f__Lachnospiraceae                 | g__ASF356                               | M9  | 0        |
| ASV67    | p__Bacteroidota    | f__Muribaculaceae                  | g__norank_f__Muribaculaceae             | M10 | 0.000026 |
| ASV601   | p__Firmicutes      | f__Ruminococcaceae                 | g__unclassified_f__Ruminococcaceae<br>e | M10 | 0.000024 |
| ASV629   | p__Firmicutes      | f__Lachnospiraceae                 | g__unclassified_f__Lachnospiraceae      | M10 | 0.000025 |
| ASV581   | p__Firmicutes      | f__Lachnospiraceae                 | g__Lachnospiraceae_NK4A136_gro<br>up    | M10 | 0.000063 |
| ASV262   | p__Firmicutes      | f__Ruminococcaceae                 | g__norank_f__Ruminococcaceae            | M10 | 0.000003 |
| ASV3697  | p__Firmicutes      | f__Lachnospiraceae                 | g__Lachnospiraceae_NK4A136_gro<br>up    | M10 | 0.000027 |
| ASV2166  | p__Firmicutes      | f__Lachnospiraceae                 | g__unclassified_f__Lachnospiraceae      | M10 | 0.000062 |
| ASV2186  | p__Firmicutes      | f__Lachnospiraceae                 | g__unclassified_f__Lachnospiraceae      | M10 | 0.000023 |
| ASV10027 | p__Firmicutes      | f__Lachnospiraceae                 | g__unclassified_f__Lachnospiraceae      | M10 | 0.012639 |
| ASV701   | p__Firmicutes      | f__Lachnospiraceae                 | g__Roseburia                            | M10 | 0.000013 |
| ASV2194  | p__Firmicutes      | f__Lachnospiraceae                 | g__unclassified_f__Lachnospiraceae      | M10 | 0.000005 |

|          |                     |                                             |                                                       |     |          |
|----------|---------------------|---------------------------------------------|-------------------------------------------------------|-----|----------|
| ASV1332  | p__Firmicutes       | f__Lachnospiraceae                          | g__unclassified_f__Lachnospiraceae                    | M10 | 0.000064 |
| ASV5466  | p__Firmicutes       | f__norank_o__Clostridia_U<br>CG-014         | g__norank_f__norank_o__Clostridia<br>_UCG-014         | M10 | 0.000019 |
| ASV897   | p__Firmicutes       | f__norank_o__Clostridia_va<br>dinBB60_group | g__norank_f__norank_o__Clostridia<br>_vadinBB60_group | M10 | 0.000023 |
| ASV2229  | p__Firmicutes       | f__norank_o__Clostridia_U<br>CG-014         | g__norank_f__norank_o__Clostridia<br>_UCG-014         | M10 | 0.000709 |
| ASV11224 | p__Firmicutes       | f__Lachnospiraceae                          | g__unclassified_f__Lachnospiraceae                    | M10 | 0.000064 |
| ASV8426  | p__Firmicutes       | f__Lachnospiraceae                          | g__unclassified_f__Lachnospiraceae                    | M10 | 0.000063 |
| ASV9     | p__Bacteroidota     | f__Prevotellaceae                           | g__Alloprevotella                                     | M11 | 0        |
| ASV562   | p__Firmicutes       | f__Lachnospiraceae                          | g__unclassified_f__Lachnospiraceae                    | M11 | 0        |
| ASV68    | p__Bacteroidota     | f__Prevotellaceae                           | g__Prevotellaceae_UCG-001                             | M11 | 0        |
| ASV41    | p__Bacteroidota     | f__Muribaculaceae                           | g__norank_f__Muribaculaceae                           | M11 | 0        |
| ASV713   | p__Proteobacteria   | f__norank_o__Rhodospirillal<br>es           | g__norank_f__norank_o__Rhodospi<br>rillales           | M11 | 0        |
| ASV282   | p__Deferribacterota | f__Deferribacteraceae                       | g__Mucispirillum                                      | M11 | 0        |
| ASV1150  | p__Firmicutes       | f__Lachnospiraceae                          | g__unclassified_f__Lachnospiraceae                    | M11 | 0        |
| ASV2464  | p__Bacteroidota     | f__Prevotellaceae                           | g__Alloprevotella                                     | M11 | 0        |
| ASV198   | p__Bacteroidota     | f__Muribaculaceae                           | g__norank_f__Muribaculaceae                           | M11 | 0        |
| ASV638   | p__Firmicutes       | f__Lachnospiraceae                          | g__Lachnospiraceae_NK4A136_gro<br>up                  | M11 | 0        |
| ASV1697  | p__Firmicutes       | f__Ruminococcaceae                          | g__Anaerotruncus                                      | M11 | 0        |

---

|         |                 |                          |                                      |     |   |
|---------|-----------------|--------------------------|--------------------------------------|-----|---|
| ASV2465 | p__Firmicutes   | f__Lachnospiraceae       | g__Lachnospiraceae_UCG-001           | M11 | 0 |
| ASV2333 | p__Firmicutes   | f__Lachnospiraceae       | g__unclassified_f__Lachnospiraceae   | M11 | 0 |
| ASV2466 | p__Bacteroidota | f__Prevotellaceae        | g__Alloprevotella                    | M11 | 0 |
| ASV2467 | p__Firmicutes   | f__Lachnospiraceae       | g__unclassified_f__Lachnospiraceae   | M11 | 0 |
| ASV560  | p__Firmicutes   | f__Lachnospiraceae       | g__unclassified_f__Lachnospiraceae   | M12 | 0 |
| ASV234  | p__Firmicutes   | f__Lachnospiraceae       | g__unclassified_f__Lachnospiraceae   | M12 | 0 |
| ASV1856 | p__Firmicutes   | f__Lachnospiraceae       | g__unclassified_f__Lachnospiraceae   | M12 | 0 |
| ASV3403 | p__Firmicutes   | f__Peptostreptococcaceae | g__Romboutsia                        | M12 | 0 |
| ASV1616 | p__Firmicutes   | f__Lachnospiraceae       | g__Acetatifactor                     | M12 | 0 |
| ASV657  | p__Firmicutes   | f__Lachnospiraceae       | g__unclassified_f__Lachnospiraceae   | M12 | 0 |
| ASV3084 | p__Firmicutes   | f__Oscillospiraceae      | g__Colidextribacter                  | M12 | 0 |
| ASV2491 | p__Firmicutes   | f__Lachnospiraceae       | g__unclassified_f__Lachnospiraceae   | M12 | 0 |
| ASV2187 | p__Firmicutes   | f__Lachnospiraceae       | g__unclassified_f__Lachnospiraceae   | M12 | 0 |
| ASV4241 | p__Firmicutes   | f__Lachnospiraceae       | g__unclassified_f__Lachnospiraceae   | M12 | 0 |
| ASV2806 | p__Firmicutes   | f__Lachnospiraceae       | g__unclassified_f__Lachnospiraceae   | M12 | 0 |
| ASV4239 | p__Firmicutes   | f__Ruminococcaceae       | g__Ruminococcus                      | M12 | 0 |
| ASV4243 | p__Firmicutes   | f__Lachnospiraceae       | g__unclassified_f__Lachnospiraceae   | M12 | 0 |
| ASV4240 | p__Firmicutes   | f__Lactobacillaceae      | g__Lactobacillus                     | M12 | 0 |
| ASV1048 | p__Firmicutes   | f__Oscillospiraceae      | g__unclassified_f__Oscillospiraceae  | M13 | 0 |
| ASV2472 | p__Bacteroidota | f__Muribaculaceae        | g__norank_f__Muribaculaceae          | M13 | 0 |
| ASV664  | p__Firmicutes   | f__Lachnospiraceae       | g__Lachnospiraceae_NK4A136_gro<br>up | M13 | 0 |

---

|         |                     |                                         |                                                   |     |   |
|---------|---------------------|-----------------------------------------|---------------------------------------------------|-----|---|
| ASV6654 | p__Firmicutes       | f__Ruminococcaceae                      | g__Ruminococcus                                   | M13 | 0 |
| ASV605  | p__Firmicutes       | f__Lachnospiraceae                      | g__Roseburia                                      | M13 | 0 |
| ASV700  | p__Actinobacteriota | f__Eggerthellaceae                      | g__Enterorhabdus                                  | M13 | 0 |
| ASV7111 | p__Firmicutes       | f__norank_o__Clostridia_vadinBB60_group | g__norank_f__norank_o__Clostridia_vadinBB60_group | M13 | 0 |
| ASV1139 | p__Bacteroidota     | f__Muribaculaceae                       | g__norank_f__Muribaculaceae                       | M13 | 0 |
| ASV6812 | p__Firmicutes       | f__Lachnospiraceae                      | g__norank_f__Lachnospiraceae                      | M13 | 0 |
| ASV5025 | p__Firmicutes       | f__Anaerovoracaceae                     | g__Eubacterium_brachy_group                       | M13 | 0 |
| ASV7951 | p__Firmicutes       | f__norank_o__Clostridia_vadinBB60_group | g__norank_f__norank_o__Clostridia_vadinBB60_group | M13 | 0 |
| ASV7950 | p__Firmicutes       | f__Lachnospiraceae                      | g__Lachnospiraceae_NK4A136_group                  | M13 | 0 |
| ASV7949 | p__Firmicutes       | f__Lachnospiraceae                      | g__norank_f__Lachnospiraceae                      | M13 | 0 |
| ASV182  | p__Bacteroidota     | f__Marinifilaceae                       | g__Odoribacter                                    | M14 | 0 |
| ASV2178 | p__Firmicutes       | f__Lachnospiraceae                      | g__unclassified_f__Lachnospiraceae                | M14 | 0 |
| ASV8840 | p__Firmicutes       | f__Lachnospiraceae                      | g__unclassified_f__Lachnospiraceae                | M14 | 0 |
| ASV2000 | p__Firmicutes       | f__Lachnospiraceae                      | g__Roseburia                                      | M14 | 0 |
| ASV652  | p__Firmicutes       | f__Lachnospiraceae                      | g__unclassified_f__Lachnospiraceae                | M14 | 0 |
| ASV4714 | p__Firmicutes       | f__Lachnospiraceae                      | g__A2                                             | M14 | 0 |
| ASV2182 | p__Firmicutes       | f__Lachnospiraceae                      | g__unclassified_f__Lachnospiraceae                | M14 | 0 |
| ASV8843 | p__Firmicutes       | f__Oscillospiraceae                     | g__Oscillibacter                                  | M14 | 0 |
| ASV8841 | p__Desulfobacterota | f__Desulfovibrionaceae                  | g__norank_f__Desulfovibrionaceae                  | M14 | 0 |

---

|          |                 |                                     |                                               |     |   |
|----------|-----------------|-------------------------------------|-----------------------------------------------|-----|---|
| ASV8844  | p__Firmicutes   | f__norank_o__Clostridia_U<br>CG-014 | g__norank_f__norank_o__Clostridia<br>_UCG-014 | M14 | 0 |
| ASV8842  | p__Firmicutes   | f__Lachnospiraceae                  | g__unclassified_f__Lachnospiraceae            | M14 | 0 |
| ASV1288  | p__Firmicutes   | f__norank_o__Clostridia_U<br>CG-014 | g__norank_f__norank_o__Clostridia<br>_UCG-014 | M14 | 0 |
| ASV7     | p__Bacteroidota | f__Bacteroidaceae                   | g__Bacteroides                                | M15 | 0 |
| ASV220   | p__Bacteroidota | f__Muribaculaceae                   | g__norank_f__Muribaculaceae                   | M15 | 0 |
| ASV12326 | p__Firmicutes   | f__Lachnospiraceae                  | g__unclassified_f__Lachnospiraceae            | M15 | 0 |
| ASV5487  | p__Firmicutes   | f__Lachnospiraceae                  | g__Roseburia                                  | M15 | 0 |
| ASV2519  | p__Firmicutes   | f__Lachnospiraceae                  | g__unclassified_f__Lachnospiraceae            | M15 | 0 |
| ASV12327 | p__Firmicutes   | f__Lachnospiraceae                  | g__unclassified_f__Lachnospiraceae            | M15 | 0 |
| ASV1860  | p__Bacteroidota | f__Bacteroidaceae                   | g__Bacteroides                                | M15 | 0 |
| ASV11720 | p__Firmicutes   | f__Lachnospiraceae                  | g__Lachnospiraceae_NK4A136_gro<br>up          | M15 | 0 |
| ASV5024  | p__Firmicutes   | f__Lachnospiraceae                  | g__unclassified_f__Lachnospiraceae            | M15 | 0 |
| ASV1172  | p__Firmicutes   | f__norank_o__Clostridia_U<br>CG-014 | g__norank_f__norank_o__Clostridia<br>_UCG-014 | M15 | 0 |
| ASV1639  | p__Firmicutes   | f__norank_o__Clostridia_U<br>CG-014 | g__norank_f__norank_o__Clostridia<br>_UCG-014 | M16 | 0 |
| ASV2167  | p__Firmicutes   | f__Lachnospiraceae                  | g__unclassified_f__Lachnospiraceae            | M16 | 0 |
| ASV2264  | p__Firmicutes   | f__Lachnospiraceae                  | g__unclassified_f__Lachnospiraceae            | M16 | 0 |
| ASV1638  | p__Firmicutes   | f__norank_o__Clostridia_U           | g__norank_f__norank_o__Clostridia             | M16 | 0 |

---

|          |                     | CG-014                 | UCG-014                            |     |   |
|----------|---------------------|------------------------|------------------------------------|-----|---|
| ASV5440  | p__Firmicutes       | f__Lachnospiraceae     | g__unclassified_f__Lachnospiraceae | M16 | 0 |
| ASV197   | p__Firmicutes       | f__Lachnospiraceae     | g__unclassified_f__Lachnospiraceae | M16 | 0 |
| ASV2468  | p__Firmicutes       | f__Lachnospiraceae     | g__norank_f__Lachnospiraceae       | M16 | 0 |
| ASV795   | p__Firmicutes       | f__Anaerovoracaceae    | g__Eubacterium_nodatum_group       | M16 | 0 |
| ASV634   | p__Firmicutes       | f__Lachnospiraceae     | g__Roseburia                       | M17 | 0 |
| ASV64    | p__Bacteroidota     | f__Muribaculaceae      | g__norank_f__Muribaculaceae        | M17 | 0 |
| ASV755   | p__Bacteroidota     | f__Rikenellaceae       | g__Alistipes                       | M17 | 0 |
| ASV3404  | p__Firmicutes       | f__Lachnospiraceae     | g__unclassified_f__Lachnospiraceae | M17 | 0 |
| ASV4695  | p__Desulfobacterota | f__Desulfovibrionaceae | g__Desulfovibrio                   | M17 | 0 |
| ASV10794 | p__Firmicutes       | f__Lactobacillaceae    | g__Lactobacillus                   | M17 | 0 |
| ASV8850  | p__Firmicutes       | f__Lachnospiraceae     | g__Lachnospiraceae_NK4A136_group   | M17 | 0 |
|          |                     |                        | up                                 |     |   |
| ASV53    | p__Bacteroidota     | f__Marinifilaceae      | g__Odoribacter                     | M18 | 0 |
| ASV76    | p__Bacteroidota     | f__Rikenellaceae       | g__Alistipes                       | M18 | 0 |
| ASV604   | p__Bacteroidota     | f__Rikenellaceae       | g__Alistipes                       | M18 | 0 |
| ASV295   | p__Firmicutes       | f__Butyricicoccaceae   | g__Butyricoccus                    | M18 | 0 |
| ASV692   | p__Firmicutes       | f__Oscillospiraceae    | g__norank_f__Oscillospiraceae      | M18 | 0 |
| ASV653   | p__Firmicutes       | f__Lachnospiraceae     | g__ASF356                          | M18 | 0 |
| ASV5448  | p__Firmicutes       | f__Oscillospiraceae    | g__Colidextribacter                | M19 | 0 |
| ASV3066  | p__Firmicutes       | f__Lachnospiraceae     | g__unclassified_f__Lachnospiraceae | M19 | 0 |
| ASV2808  | p__Firmicutes       | f__Lachnospiraceae     | g__norank_f__Lachnospiraceae       | M19 | 0 |



|         |                     |                                     |                                               |     |          |
|---------|---------------------|-------------------------------------|-----------------------------------------------|-----|----------|
| ASV4258 | p__Firmicutes       | f__Ruminococcaceae                  | g__Ruminococcus                               | M19 | 0        |
| ASV9697 | p__Firmicutes       | f__unclassified_c__Clostridia<br>a  | g__unclassified_c__Clostridia                 | M19 | 0        |
| ASV585  | p__Firmicutes       | f__Lachnospiraceae                  | g__GCA-900066575                              | M20 | 0        |
| ASV2157 | p__Firmicutes       | f__Lachnospiraceae                  | g__Anaerostipes                               | M20 | 0        |
| ASV386  | p__Firmicutes       | f__norank_o__Clostridia_U<br>CG-014 | g__norank_f__norank_o__Clostridia<br>_UCG-014 | M20 | 0        |
| ASV30   | p__Firmicutes       | f__Lachnospiraceae                  | g__Anaerostipes                               | M21 | 0        |
| ASV450  | p__Desulfobacterota | f__Desulfovibrionaceae              | g__Desulfovibrio                              | M21 | 0        |
| ASV1599 | p__Firmicutes       | f__Lachnospiraceae                  | g__unclassified_f__Lachnospiraceae            | M21 | 0        |
| ASV577  | p__Firmicutes       | f__Lachnospiraceae                  | g__unclassified_f__Lachnospiraceae            | M22 | 0        |
| ASV2802 | p__Firmicutes       | f__Lachnospiraceae                  | g__unclassified_f__Lachnospiraceae            | M22 | 0        |
| ASV2206 | p__Actinobacteriota | f__Eggerthellaceae                  | g__Enterorhabdus                              | M22 | 0        |
| ASV177  | p__Firmicutes       | f__Oscillospiraceae                 | g__unclassified_f__Oscillospiraceae           | M23 | 0        |
| ASV236  | p__Firmicutes       | f__Oscillospiraceae                 | g__norank_f__Oscillospiraceae                 | M23 | 0        |
| ASV257  | p__Firmicutes       | f__Oscillospiraceae                 | g__unclassified_f__Oscillospiraceae           | M23 | 0        |
| ASV61   | p__Bacteroidota     | f__Muribaculaceae                   | g__norank_f__Muribaculaceae                   | M24 | 0.000643 |
| ASV207  | p__Firmicutes       | f__Lachnospiraceae                  | g__norank_f__Lachnospiraceae                  | M24 | 0.011101 |
| ASV300  | p__Desulfobacterota | f__Desulfovibrionaceae              | g__norank_f__Desulfovibrionaceae              | M24 | 0.000643 |
| ASV1049 | p__Bacteroidota     | f__Muribaculaceae                   | g__norank_f__Muribaculaceae                   | M25 | 0        |
| ASV691  | p__Bacteroidota     | f__Muribaculaceae                   | g__norank_f__Muribaculaceae                   | M25 | 0        |
| ASV1055 | p__Bacteroidota     | f__Muribaculaceae                   | g__norank_f__Muribaculaceae                   | M25 | 0        |

---

|          |                     |                        |                                    |     |   |
|----------|---------------------|------------------------|------------------------------------|-----|---|
| ASV1072  | p__Bacteroidota     | f__Muribaculaceae      | g__norank_f__Muribaculaceae        | M26 | 0 |
| ASV643   | p__Desulfobacterota | f__Desulfovibrionaceae | g__norank_f__Desulfovibrionaceae   | M26 | 0 |
| ASV1101  | p__Firmicutes       | f__Lachnospiraceae     | g__unclassified_f__Lachnospiraceae | M27 | 0 |
| ASV1113  | p__Firmicutes       | f__Anaerovoracaceae    | g__Eubacterium_brachy_group        | M27 | 0 |
| ASV52    | p__Bacteroidota     | f__Muribaculaceae      | g__norank_f__Muribaculaceae        | M28 | 0 |
| ASV129   | p__Firmicutes       | f__Lachnospiraceae     | g__unclassified_f__Lachnospiraceae | M28 | 0 |
| ASV1053  | p__Patescibacteria  | f__Saccharimonadaceae  | g__Candidatus_Saccharimonas        | M29 | 0 |
| ASV1074  | p__Firmicutes       | f__Lachnospiraceae     | g__unclassified_f__Lachnospiraceae | M29 | 0 |
| ASV704   | p__Firmicutes       | f__Lachnospiraceae     | g__Roseburia                       | M30 | 0 |
| ASV2473  | p__Bacteroidota     | f__Rikenellaceae       | g__Alistipes                       | M30 | 0 |
| ASV2156  | p__Deferribacterota | f__Deferribacteraceae  | g__Mucispirillum                   | M31 | 0 |
| ASV1867  | p__Firmicutes       | f__Oscillospiraceae    | g__Oscillibacter                   | M31 | 0 |
| ASV95    | p__Bacteroidota     | f__Muribaculaceae      | g__norank_f__Muribaculaceae        | M32 | 0 |
| ASV119   | p__Bacteroidota     | f__Muribaculaceae      | g__norank_f__Muribaculaceae        | M32 | 0 |
| ASV96    | p__Bacteroidota     | f__Rikenellaceae       | g__Alistipes                       | M33 | 0 |
| ASV3414  | p__Bacteroidota     | f__Rikenellaceae       | g__Alistipes                       | M33 | 0 |
| ASV637   | p__Firmicutes       | f__Oscillospiraceae    | g__Colidextribacter                | M34 | 0 |
| ASV13015 | p__Firmicutes       | f__Lactobacillaceae    | g__Lactobacillus                   | M34 | 0 |
| ASV153   | p__Bacteroidota     | f__Muribaculaceae      | g__norank_f__Muribaculaceae        | M35 | 0 |
| ASV590   | p__Bacteroidota     | f__Muribaculaceae      | g__norank_f__Muribaculaceae        | M35 | 0 |
| ASV71    | p__Desulfobacterota | f__Desulfovibrionaceae | g__Desulfovibrio                   | M36 | 0 |
| ASV1056  | p__Desulfobacterota | f__Desulfovibrionaceae | g__Desulfovibrio                   | M36 | 0 |

---

|         |                 |                     |                                     |     |   |
|---------|-----------------|---------------------|-------------------------------------|-----|---|
| ASV8    | p__Bacteroidota | f__Rikenellaceae    | g__Rikenellaceae_RC9_gut_group      | M37 | 0 |
| ASV120  | p__Bacteroidota | f__Rikenellaceae    | g__Rikenellaceae_RC9_gut_group      | M37 | 0 |
| ASV102  | p__Bacteroidota | f__Muribaculaceae   | g__norank_f__Muribaculaceae         | M38 | 0 |
| ASV1086 | p__Bacteroidota | f__Muribaculaceae   | g__norank_f__Muribaculaceae         | M38 | 0 |
| ASV1103 | p__Firmicutes   | f__Oscillospiraceae | g__unclassified_f__Oscillospiraceae | M39 | 0 |
| ASV1586 | p__Firmicutes   | f__Oscillospiraceae | g__unclassified_f__Oscillospiraceae | M39 | 0 |
| ASV593  | p__Firmicutes   | f__Oscillospiraceae | g__norank_f__Oscillospiraceae       | M40 | 0 |
| ASV599  | p__Firmicutes   | f__Oscillospiraceae | g__norank_f__Oscillospiraceae       | M40 | 0 |
| ASV83   | p__Bacteroidota | f__Muribaculaceae   | g__norank_f__Muribaculaceae         | M41 | 0 |
| ASV78   | p__Bacteroidota | f__Muribaculaceae   | g__norank_f__Muribaculaceae         | M41 | 0 |
| ASV10   | p__Firmicutes   | f__Lactobacillaceae | g__Lactobacillus                    | M42 | 0 |
| ASV75   | p__Firmicutes   | f__Lactobacillaceae | g__Lactobacillus                    | M42 | 0 |

**Supplementary Table S5 The top 50 metabolites of *W. coagulans* BC-G44 supernatant in both positive and negative ion modes**

| Name            | m/z      | rt(s)   | SuperClass                    | Class                            | SubClass                             | mean        | SD          | proportion |
|-----------------|----------|---------|-------------------------------|----------------------------------|--------------------------------------|-------------|-------------|------------|
| <b>pos</b>      |          |         |                               |                                  |                                      |             |             |            |
| Arginine        | 175.1162 | 520.304 | Organic acids and derivatives | Carboxylic acids and derivatives | Amino acids, peptides, and analogues | 144159638.4 | 53393083.94 | 10.10      |
| Triethanolamine | 337.1659 | 509.315 | Organonitrogen compounds      | Amines                           | Alkanolamines                        | 95345434.16 | 50061279.53 | 6.68       |
| Pyridoxine      | 170.0786 | 113.154 | Organoheterocyclic compounds  | Pyridines derivatives            | and Pyridoxines                      | 77968273.2  | 8201877.703 | 5.46       |
| Dibucaine       | 344.224  | 83.746  | Organoheterocyclic compounds  | Quinolines derivatives           | and Quinolones and derivatives       | 64614471.91 | 2838797.465 | 4.53       |
| Adenine         | 136.0593 | 157.599 | Organoheterocyclic compounds  | Imidazopyrimidines               | Purines and purine derivatives       | 51570168.99 | 4621301.122 | 3.61       |

|                                                                                                         |          |          |                               |                                  |                                        |             |             |      |
|---------------------------------------------------------------------------------------------------------|----------|----------|-------------------------------|----------------------------------|----------------------------------------|-------------|-------------|------|
| Thiamine                                                                                                | 265.1074 | 376.313  | Organoheterocyclic compounds  | Diazines                         | Pyrimidines and pyrimidine derivatives | 47956358.9  | 6924687.837 | 3.36 |
| 2-ethylpyrazine                                                                                         | 109.0736 | 249.023  | Organoheterocyclic compounds  | Diazines                         | Pyrazines                              | 33216585.26 | 556273.1933 | 2.33 |
| Carnitine                                                                                               | 162.1094 | 344.525  | Organic nitrogen compounds    | Organonitrogen compounds         | Quaternary ammonium salts              | 32754561.88 | 2951009.107 | 2.29 |
| 2-amino-1-phenylethanol                                                                                 | 120.0785 | 248.383  | Organic nitrogen compounds    | Organonitrogen compounds         | Amines                                 | 29812834.17 | 9830365.051 | 2.09 |
| Pro-Trp                                                                                                 | 302.3011 | 63.263   | Organic nitrogen compounds    | Organonitrogen compounds         | Amines                                 | 27241446.57 | 2593792.155 | 1.91 |
| C17-sphinganine                                                                                         | 288.286  | 64.905   | Organic nitrogen compounds    | Organonitrogen compounds         | Amines                                 | 26032342.72 | 3463009.009 | 1.82 |
| 1,5-pentanediamine                                                                                      | 86.09444 | 254.146  | Organic nitrogen compounds    | Organonitrogen compounds         | Amines                                 | 24104136.35 | 2252563.068 | 1.69 |
| L-Arginine                                                                                              | 175.116  | 577.9235 | Organic acids and derivatives | Carboxylic acids and derivatives | Amino acids, peptides, and analogues   | 22115947.23 | 6167277.758 | 1.55 |
| N-(1-amino-3,3-dimethyl-1-oxobutan-2-yl)-1-pentyl-1h-indole-3-carboxamide                               | 327.197  | 83.863   | Organic acids and derivatives | Carboxylic acids and derivatives | Amino acids, peptides, and analogues   | 20673393.79 | 857525.1253 | 1.45 |
| Methyl (1-(cyclohexylmethyl)-1h-indole-3-carbonyl)-l-valinate                                           | 371.2221 | 90.756   | Organic acids and derivatives | Carboxylic acids and derivatives | Amino acids, peptides, and analogues   | 18175869.35 | 1728607.587 | 1.27 |
| Dfnha                                                                                                   | 155.0792 | 72.937   | Organic acids and derivatives | Carboxylic acids and derivatives | Amino acids, peptides, and analogues   | 16834139.93 | 6379480.735 | 1.18 |
| His-Pro                                                                                                 | 235.1158 | 143.133  | Organic acids and derivatives | Carboxylic acids and derivatives | Amino acids, peptides, and analogues   | 15763733.45 | 5105553.211 | 1.10 |
| DL-phenylalanine                                                                                        | 166.0836 | 248.383  | Organic acids and derivatives | Carboxylic acids and derivatives | Amino acids, peptides, and analogues   | 15273724.24 | 328764.0251 | 1.07 |
| Creatinine                                                                                              | 114.0645 | 167.818  | Organic acids and derivatives | Carboxylic acids and derivatives | Amino acids, peptides, and analogues   | 13897863.25 | 1062440.404 | 0.97 |
| Creatine                                                                                                | 132.0737 | 337.36   | Organic acids and derivatives | Carboxylic acids and derivatives | Amino acids, peptides, and analogues   | 11995358.78 | 1063794.486 | 0.84 |
| Betaine                                                                                                 | 118.0836 | 264.432  | Organic acids and derivatives | Carboxylic acids and derivatives | Amino acids, peptides, and analogues   | 11949145.19 | 971901.2563 | 0.84 |
| DL-arginine                                                                                             | 158.0894 | 302.972  | Organic acids and derivatives | Carboxylic acids and derivatives | Amino acids, peptides, and analogues   | 11798128.73 | 234631.5315 | 0.83 |
| Tyrosine                                                                                                | 182.0776 | 292.073  | Organic acids and derivatives | Carboxylic acids and derivatives | Amino acids, peptides, and analogues   | 10089907.62 | 754130.3022 | 0.71 |
| Ala-Arg                                                                                                 | 247.1365 | 340.017  | Organic acids and derivatives | Carboxylic acids and derivatives | Amino acids, peptides, and analogues   | 9962825.248 | 491879.955  | 0.70 |
| Benzoic acid, 3-[[3-carboxycyclohexyl)amino]carbonyl]-4-[3-[4-[4-(cyclohexyloxy)butoxy]phenyl]propoxy]- | 618.3133 | 406.863  | Organic acids and derivatives | Carboxylic acids and derivatives | Amino acids, peptides, and analogues   | 9251703.236 | 763560.8159 | 0.65 |
| Pro-asn                                                                                                 | 230.1099 | 332.21   | Organic acids and derivatives | Carboxylic acids and derivatives | Amino acids, peptides, and analogues   | 8382691.684 | 3647574.532 | 0.59 |

|                                                                                                |          |         |                                         |                                  |                                      |             |             |      |
|------------------------------------------------------------------------------------------------|----------|---------|-----------------------------------------|----------------------------------|--------------------------------------|-------------|-------------|------|
| Phe-Asn-Arg                                                                                    | 436.2091 | 295.278 | Organic acids and derivatives           | Carboxylic acids and derivatives | Amino acids, peptides, and analogues | 8285591.78  | 1173337.457 | 0.58 |
| S-methyl-5'-thioadenosine                                                                      | 298.0922 | 102.272 | Nucleosides, nucleotides, and analogues | 5'-deoxyribonucleosides          | 5'-deoxy-5'-thionucleosides          | 8213109.962 | 1146334.953 | 0.58 |
| Glycerophosphocholine                                                                          | 258.1062 | 375.638 | Lipids and lipid-like molecules         | Glycerophospholipids             | Glycerophosphocholines               | 7957690.726 | 442829.2585 | 0.56 |
| Cis-11,14-eicosadienoic acid                                                                   | 309.2749 | 32.95   | Lipids and lipid-like molecules         | Fatty Acyls                      | Fatty acids and conjugates           | 7863464.617 | 99119.0027  | 0.55 |
| 13[(2r,3s)-3-pentylxiranyl]-8z-tridecenoic acid                                                | 307.2598 | 32.9975 | Lipids and lipid-like molecules         | Fatty Acyls                      | Fatty acids and conjugates           | 7425318.128 | 927709.7466 | 0.52 |
| Solamargine                                                                                    | 868.4965 | 148.19  | Lipids and lipid-like molecules         | Steroids and steroid derivatives | Steroidal glycosides                 | 6828298.98  | 416093.001  | 0.48 |
| 15s-hydroperoxy-11z,13e-eicosadienoic acid                                                     | 323.2537 | 40.579  | Lipids and lipid-like molecules         | Fatty Acyls                      | Eicosanoids                          | 6811187.18  | 688915.6864 | 0.48 |
| Methasterone                                                                                   | 283.2604 | 32.391  | Lipids and lipid-like molecules         | Steroids and steroid derivatives | Androstane steroids                  | 6172002.668 | 583853.2789 | 0.43 |
| Leukotriene f4                                                                                 | 569.3075 | 119.574 | Lipids and lipid-like molecules         | Fatty Acyls                      | Eicosanoids                          | 6096161.317 | 166001.0572 | 0.43 |
| 7-(triethylsilyl)-10-deacetylbaecatin iii                                                      | 641.3239 | 429.437 | Lipids and lipid-like molecules         | Prenol lipids                    | Diterpenoids                         | 5927105.105 | 817861.1914 | 0.42 |
| N-myristoylsphinganine                                                                         | 512.4983 | 32.32   | Lipids and lipid-like molecules         | Sphingolipids                    | Ceramides                            | 5897253.099 | 1761759.734 | 0.41 |
| Erucamide                                                                                      | 338.3378 | 32.95   | Lipids and lipid-like molecules         | Fatty Acyls                      | Fatty amides                         | 5616791.91  | 767706.6396 | 0.39 |
| Cimicifugoside h 2                                                                             | 657.3576 | 131.701 | Lipids and lipid-like molecules         | Steroids and steroid derivatives | Cycloartanols and derivatives        | 5530127.289 | 381630.4451 | 0.39 |
| 1-monolinoleoyl-rac-glycerol                                                                   | 263.2342 | 50.3065 | Lipids and lipid-like molecules         | Fatty Acyls                      | Lineolic acids and derivatives       | 5219750.017 | 341038.9136 | 0.37 |
| Fenpropidin                                                                                    | 274.2708 | 67.227  | Benzenoids                              | Benzene substituted derivatives  | and Phenylpropanes                   | 5183842.814 | 82150.85672 | 0.36 |
| Benzeneethanamine, 3,5-dimethoxy-.alpha.-methyl-4-propoxy-                                     | 254.1571 | 323.796 | Benzenoids                              | Benzene substituted derivatives  | and Phenethylamines                  | 5108743.516 | 2572548.094 | 0.36 |
| DL-octopamine                                                                                  | 136.0729 | 292.073 | Benzenoids                              | Phenols                          | 1-hydroxy-2-unsubstituted benzenoids | 5101121.31  | 613232.6079 | 0.36 |
| Lavandulol                                                                                     | 309.2753 | 77.328  |                                         |                                  |                                      | 5087715.506 | 685821.4727 | 0.36 |
| (Z)-6-Octadecenoic acid                                                                        | 283.2604 | 53.811  |                                         |                                  |                                      | 5033326.221 | 528067.8566 | 0.35 |
| 5-methylbenzotriazole                                                                          | 134.0577 | 112.542 |                                         |                                  |                                      | 4898182.557 | 570701.003  | 0.34 |
| 2-piperidinecarboxylic acid, 1-(3,3-dimethyl-1,2-dioxopentyl)-, (1r)-1-(3-aminophenyl)-3-(3,4- | 525.2808 | 113.182 |                                         |                                  |                                      | 4757664.227 | 383905.1411 | 0.33 |

|                                     |          |         |  |  |  |             |             |      |
|-------------------------------------|----------|---------|--|--|--|-------------|-------------|------|
| dimethoxyphenyl)propyl ester, (2s)- |          |         |  |  |  |             |             |      |
| Glu-Pro                             | 286.1465 | 378.838 |  |  |  | 4553512.368 | 712201.9267 | 0.32 |
| trans-2-Hydroxycinnamic acid        | 165.0513 | 292.073 |  |  |  | 4516747.254 | 344611.9678 | 0.32 |
| Bendiocarb                          | 167.0905 | 130.432 |  |  |  | 4130091.965 | 529334.3482 | 0.29 |

**neg**

|                                  |          |          |                                  |                                  |                                           |            |            |       |
|----------------------------------|----------|----------|----------------------------------|----------------------------------|-------------------------------------------|------------|------------|-------|
| Citrate                          | 191.0209 | 451.0525 | Organic acids and derivatives    | Carboxylic acids and derivatives | Tricarboxylic acids and derivatives       | 37683272.8 | 7014301.11 | 10.55 |
| Linoleic acid                    | 279.2339 | 37.361   | Lipids and lipid-like molecules  | Fatty Acyls                      | Lineolic acids and derivatives            | 24664568.6 | 15396194.8 | 6.90  |
| DL-lactate                       | 89.0242  | 218.375  | Organic acids and derivatives    | Hydroxy acids and derivatives    | Alpha hydroxy acids and derivatives       | 22616226.9 | 1635008.22 | 6.33  |
| Oleic acid                       | 281.2496 | 37.457   | Lipids and lipid-like molecules  | Fatty Acyls                      | Fatty acids and conjugates                | 21929073.4 | 3979797.43 | 6.14  |
| Hydroxyisocaproic acid           | 131.0715 | 128.961  | Lipids and lipid-like molecules  | Fatty Acyls                      | Fatty acids and conjugates                | 21308647.9 | 1101132.41 | 5.96  |
| Phenyllactic acid                | 165.0562 | 112.289  | Phenylpropanoids and polyketides | Phenylpropanoic acids            | 16499997.2                                | 1219419.83 | 4.62       |       |
| L-pyroglutamic acid              | 128.0358 | 283.165  | Organic acids and derivatives    | Carboxylic acids and derivatives | Amino acids, peptides, and analogues      | 13531408.7 | 2302461.37 | 3.79  |
| Arachidonic acid (peroxide free) | 303.2317 | 37.981   | Lipids and lipid-like molecules  | Fatty Acyls                      | Fatty acids and conjugates                | 13216136.9 | 22800674.1 | 3.70  |
| Leucine                          | 130.0872 | 253.563  | Organic acids and derivatives    | Carboxylic acids and derivatives | Amino acids, peptides, and analogues      | 10370981   | 625708.205 | 2.90  |
| D-Mannose                        | 179.0565 | 327.355  | Organic oxygen compounds         | Organooxygen compounds           | Carbohydrates and carbohydrate conjugates | 8893013.49 | 235372.367 | 2.49  |
| N-acetyl-L-tyrosine              | 180.0665 | 290.125  | Organic acids and derivatives    | Carboxylic acids and derivatives | Amino acids, peptides, and analogues      | 7743854.08 | 447348.445 | 2.17  |
| Cyclo(tyrosyl-prolyl)            | 259.1093 | 58.7725  | Organic acids and derivatives    | Carboxylic acids and derivatives | Amino acids, peptides, and analogues      | 7615396.64 | 720122.667 | 2.13  |
| Phenylalanine                    | 164.0724 | 247.893  | Organic acids and derivatives    | Carboxylic acids and derivatives | Amino acids, peptides, and analogues      | 7123647.6  | 493180.269 | 1.99  |
| Hydroquinidine                   | 325.1841 | 26.012   |                                  |                                  |                                           | 5688097.25 | 2902551.39 | 1.59  |
| Thymol-beta-d-glucoside          | 311.1692 | 26.012   | Lipids and lipid-like molecules  | Prenol lipids                    | Terpene glycosides                        | 5504865.44 | 3264607.84 | 1.54  |
| Palmitic acid                    | 255.2338 | 36.827   | Lipids and lipid-like molecules  | Fatty Acyls                      | Fatty acids and conjugates                | 5150427.05 | 1410071.64 | 1.44  |
| Cis,cis-muconic acid             | 141.0164 | 362.173  | Lipids and lipid-like molecules  | Fatty Acyls                      | Fatty acids and conjugates                | 4947522.95 | 515132.479 | 1.38  |
| 3-hydroxyglutaric acid           | 147.0446 | 112.526  | Organic acids and derivatives    | Hydroxy acids and derivatives    | Beta hydroxy acids and derivatives        | 4902188.43 | 1479732.02 | 1.37  |
| Indinavir                        | 612.3381 | 292.655  | Organic acids and derivatives    | Carboxylic acids and derivatives | Amino acids, peptides, and analogues      | 4513253.9  | 229005.874 | 1.26  |

|                                                                                                                |          |          |                                 |                                        |                                           |            |            |      |
|----------------------------------------------------------------------------------------------------------------|----------|----------|---------------------------------|----------------------------------------|-------------------------------------------|------------|------------|------|
| Gly-His-Lys                                                                                                    | 339.1996 | 25.518   | Organic acids and derivatives   | Carboxylic acids and derivatives       | Amino acids, peptides, and analogues      | 4028796.81 | 1900086.91 | 1.13 |
| Taurine                                                                                                        | 124.0071 | 282.535  | Organic acids and derivatives   | Organic sulfonic acids and derivatives | Organosulfonic acids and derivatives      | 3653474.37 | 4164846.35 | 1.02 |
| 2-hydroxyadenine                                                                                               | 150.0559 | 110.022  | Organoheterocyclic compounds    | Imidazopyrimidines                     | Purines and purine derivatives            | 3491522.34 | 85395.4906 | 0.98 |
| 2-hydroxy-6-methylquinoline-3-carbaldehyde                                                                     | 186.0454 | 24.792   | Organoheterocyclic compounds    | Quinolines and derivatives             | Quinolones and derivatives                | 3361071.95 | 114382.421 | 0.94 |
| Octadecanoic acid                                                                                              | 283.2636 | 36.827   | Lipids and lipid-like molecules | Fatty Acyls                            | Fatty acids and conjugates                | 3333451.56 | 1171095.58 | 0.93 |
| Uracil                                                                                                         | 111.0197 | 85.943   | Organoheterocyclic compounds    | Diazines                               | Pyrimidines and pyrimidine derivatives    | 3289033.74 | 568873.77  | 0.92 |
| Thymine                                                                                                        | 185.0562 | 286.3425 | Organoheterocyclic compounds    | Diazines                               | Pyrimidines and pyrimidine derivatives    | 2520404.23 | 99785.3325 | 0.71 |
| Propanoic acid, 3-[[[2-[(aminoiminomethyl)amino]-4-thiazolyl]methyl]thio]-                                     | 294.9937 | 450.415  | Organoheterocyclic compounds    | Azoles                                 | Thiazoles                                 | 2370808.48 | 284265.931 | 0.66 |
| Trans-3'-hydroxycotinine glucuronide                                                                           | 367.1054 | 268.656  | Organic oxygen compounds        | Organooxygen compounds                 | Carbohydrates and carbohydrate conjugates | 2135017.76 | 277492.935 | 0.60 |
| Ostruthin                                                                                                      | 297.1527 | 26.622   | Lipids and lipid-like molecules | Prenol lipids                          | Terpene lactones                          | 1658904.38 | 999359.71  | 0.46 |
| 5-Hydroxyhexanoic acid                                                                                         | 131.0824 | 528.235  | Lipids and lipid-like molecules | Fatty Acyls                            | Fatty acids and conjugates                | 1614808.2  | 318869.48  | 0.45 |
| (1-acetyloxy-3-hydroxy-6,8a-dimethyl-7-oxo-3-propan-2-yl-2,3a,4,8-tetrahydro-1h-azulen-4-yl) 4-hydroxybenzoate | 429.2108 | 338.724  | Lipids and lipid-like molecules | Prenol lipids                          | Sesquiterpenoids                          | 1560264.55 | 89895.7118 | 0.44 |
| 2-cis-4-trans-abscisic acid                                                                                    | 527.2828 | 288.235  | Lipids and lipid-like molecules | Prenol lipids                          | Sesquiterpenoids                          | 1506733.57 | 66500.237  | 0.42 |
| L-Leucine                                                                                                      | 130.0869 | 300.23   | Organic acids and derivatives   | Carboxylic acids and derivatives       | Amino acids, peptides, and analogues      | 1448506.15 | 93342.5536 | 0.41 |
| Telmisartan                                                                                                    | 469.2418 | 296.434  | Benzenoids                      | Benzenoids and substituted derivatives | Biphenyls and derivatives                 | 1344812.28 | 69598.2001 | 0.38 |
| Zinniol                                                                                                        | 265.1477 | 24.182   | Benzenoids                      | Benzenoids and substituted derivatives | Benzyl alcohols                           | 1334028.74 | 537783.514 | 0.37 |
| Citraconic acid                                                                                                | 129.0189 | 413.507  | Lipids and lipid-like molecules | Fatty Acyls                            | Fatty acids and conjugates                | 1206262.43 | 108701.619 | 0.34 |
| Cis-7,10,13,16-docosatetraenoic acid                                                                           | 331.2643 | 37.714   | Lipids and lipid-like molecules | Fatty Acyls                            | Fatty acids and conjugates                | 1173675.09 | 2024670.29 | 0.33 |
| N-acetyl-d-galactosamine 4-sulfate                                                                             | 282.0288 | 120.731  | Organic oxygen compounds        | Organooxygen compounds                 | Carbohydrates and carbohydrate conjugates | 1153255.44 | 147378.269 | 0.32 |
| 6,8-dihydroxy-2,2,4,4-tetramethyl-7-(3-methylbutanoyl)-9-(2-methylpropyl)-9h-xanthen-1,3-dione                 | 441.2102 | 341.8745 | Organoheterocyclic compounds    | Benzopyrans                            | 1-benzopyrans                             | 1105589.29 | 462223.592 | 0.31 |

|                                   |          |          |                                 |                                  |                                          |            |            |      |
|-----------------------------------|----------|----------|---------------------------------|----------------------------------|------------------------------------------|------------|------------|------|
| 2-dehydro-3-deoxy-d-gluconate     | 177.0399 | 378.834  |                                 |                                  |                                          | 1094823.4  | 360237.427 | 0.31 |
| Piriprost                         | 456.2446 | 292.655  | Organoheterocyclic compounds    | Pyrroles                         | Substituted pyrroles                     | 1043817.28 | 60918.5876 | 0.29 |
| 2-hydroxy-2-methylbutyric acid    | 117.0554 | 146.1305 | Lipids and lipid-like molecules | Fatty Acyls                      | Fatty acids and conjugates               | 1011081.75 | 194986.633 | 0.28 |
| Xanthine                          | 151.0258 | 207.88   | Organoheterocyclic compounds    | Imidazopyrimidines               | Purines and purine derivatives           | 983200.311 | 467977.531 | 0.28 |
| L-Tyrosine                        | 180.066  | 320.443  |                                 |                                  |                                          | 945925.668 | 367987.529 | 0.26 |
| N-acetylglutamine                 | 187.0721 | 292.655  | Organic acids and derivatives   | Carboxylic acids and derivatives | Amino acids, peptides, and analogues     | 887490.171 | 145348.703 | 0.25 |
| Tryptophan                        | 203.0826 | 249.153  | Organoheterocyclic compounds    | Indoles and derivatives          | Indolyl carboxylic acids and derivatives | 858452.658 | 72229.143  | 0.24 |
| Pyruvate                          | 87.0086  | 120.756  | Organic acids and derivatives   | Keto acids and derivatives       | Alpha-keto acids and derivatives         | 805222.254 | 33424.023  | 0.23 |
| Cis-aconitate                     | 173.0088 | 413.507  | Organic acids and derivatives   | Carboxylic acids and derivatives | Tricarboxylic acids and derivatives      | 787708.042 | 59947.2458 | 0.22 |
| sn-Glycerol 3-phosphoethanolamine | 214.0486 | 380.062  | Lipids and lipid-like molecules | Glycerophospholipids             | Glycerophosphoethanolamines              | 781224.053 | 133933.913 | 0.22 |
| Valeric acid                      | 101.0604 | 97.393   | Lipids and lipid-like molecules | Fatty Acyls                      | Fatty acids and conjugates               | 772180.994 | 196958.449 | 0.22 |

---
